# Supplementary material
Source: PubMed Central journal article supplement (PMC3575885)
Supplement: 12263_2012_301_MOESM1_ESM.pdf [file 12263_2012_301_MOESM1_ESM.pdf]

**Article title:**

*Lactobacillus paracasei* and *Lactobacillus plantarum* Strains Downregulate Proinflammatory Genes in an *Ex Vivo* System of Cultured Human Colonic Mucosa

**Journal:** Genes & Nutrition

**Authors:** Christine Bäuerl<sup>a</sup>, Marta Llopis<sup>b</sup>, María Antolín<sup>b</sup>, Vicente Monedero<sup>a</sup>, Manuel Mata<sup>c</sup>, Manuel Zúñiga<sup>a</sup>, Francisco Guarner<sup>b</sup> and Gaspar Pérez Martínez<sup>a</sup>

**Affiliation:** <sup>a</sup> Department of Food Biotechnology, Instituto de Agroquímica y Tecnología de Alimentos, CSIC, Valencia, Spain

<sup>b</sup> Digestive System Research Unit, University Hospital Vall d'Hebron, Centro de Investigación Biomédica en Red de Enfermedades Hepáticas y Digestivas (Ciberehd), Barcelona, Spain

<sup>c</sup> Research Foundation, Hospital General Universitario, University of Valencia, Valencia, Spain

**E-Mail of the corresponding Author Address:**

Gaspar Perez Martinez, e-mail: gaspar.perez@iata.csic.es

**Online Resource 1: Comparison Control samples (cultured colon tissue) vs. DF samples (directly frozen colon tissue)**

| probe set   | gene                                                                                                                                                             | Accession | EntrezGene      | Description | fold change  | P value  |
|-------------|------------------------------------------------------------------------------------------------------------------------------------------------------------------|-----------|-----------------|-------------|--------------|----------|
| 204614_at   | SERPINB2: serpin peptidase inhibitor, clade B (ovalbumin), member 2                                                                                              | NM_002575 | 5055            | g4505594    | <b>47,35</b> | 0,002051 |
| 204475_at   | MMP1: matrix metalloproteinase 1 (interstitial collagenase)                                                                                                      | NM_002421 | 4312            | g13027798   | <b>40,94</b> | 0,004923 |
| 201169_s_at | BHLHB2: basic helix-loop-helix domain containing, class B, 2                                                                                                     | BG326045  | 8553            | Hs.171825.0 | <b>36,67</b> | 0,008539 |
| 206026_s_at | TNFAIP6: tumor necrosis factor, alpha-induced protein 6                                                                                                          | NM_007115 | 7130            | g6005905    | <b>29,49</b> | 0,000673 |
| 202859_x_at | IL8: interleukin 8                                                                                                                                               | NM_000584 | 3576            | g10834977   | <b>26,53</b> | 0,000799 |
| 216236_s_at | SLC2A14 /// SLC2A3: solute carrier family 2 (facilitated glucose transporter), member 3 /// solute carrier family 2 (facilitated glucose transporter), member 14 | AL110298  | 144195 /// 6515 | Hs.7594.2   | <b>20,31</b> | 0,006174 |
| 218507_at   | HIG2: hypoxia-inducible protein 2                                                                                                                                | NM_013332 | 29923           | g7019408    | <b>19,95</b> | 0,00442  |
| 243797_at   | STK17B: serine/threonine kinase 17b                                                                                                                              | AW070323  | 9262            | Hs.88297.0  | <b>19,91</b> | 0,002246 |
| 215034_s_at | TM4SF1: transmembrane 4 L six family member 1                                                                                                                    | AI189753  | 4071            | Hs.306643.0 | <b>15,35</b> | 0,004105 |
| 213338_at   | TMEM158: transmembrane protein 158                                                                                                                               | BF062629  | 25907           | Hs.35861.0  | <b>13,66</b> | 0,001406 |
| 241031_at   | NLF1: nuclear localized factor 1                                                                                                                                 | BE218239  | 145741          | Hs.202656.0 | <b>12,7</b>  | 0,003261 |
| 209387_s_at | TM4SF1: transmembrane 4 L six family member 1                                                                                                                    | M90657    | 4071            | g186803     | <b>12,14</b> | 0,00367  |
| 202464_s_at | PFKFB3: 6-phosphofructo-2-kinase/fructose-2,6-biphosphatase 3                                                                                                    | NM_004566 | 5209            | g4758899    | <b>11,76</b> | 0,009321 |
| 204015_s_at | DUSP4: dual specificity phosphatase 4                                                                                                                            | BC002671  | 1846            | g12803670   | <b>11,5</b>  | 0,005996 |
| 209732_at   | CLEC2B: C-type lectin domain family 2, member B                                                                                                                  | BC005254  | 9976            | g13528920   | <b>11,18</b> | 0,00372  |
| 222646_s_at | ERO1L: ERO1-like (S. cerevisiae)                                                                                                                                 | AW268365  | 30001           | Hs.25740.0  | <b>10,79</b> | 0,00747  |

Online Resource 1 - Comparison Control sample vs. DF samples

|              |                                                                                      |           |               |              |              |          |
|--------------|--------------------------------------------------------------------------------------|-----------|---------------|--------------|--------------|----------|
| 207510_at    | BDKRB1: bradykinin receptor B1                                                       | NM_000710 | 623           | g4502390     | <b>10,58</b> | 0,006484 |
| 217997_at    | PHLDA1: pleckstrin homology-like domain, family A, member 1                          | AI795908  | 22822         | Hs.82101.0   | <b>10,46</b> | 0,006402 |
| 231124_x_at  | LY9: lymphocyte antigen 9                                                            | AI524095  | 4063          | Hs.111339.0  | <b>10,08</b> | 0,001776 |
| 227697_at    | SOCS3: suppressor of cytokine signaling 3                                            | AI244908  | 9021          | Hs.311405.0  | <b>10,06</b> | 0,002741 |
| 210479_s_at  | RORA: RAR-related orphan receptor A                                                  | L14611    | 6095          | g348240      | <b>9,88</b>  | 0,003666 |
| 210426_x_at  | RORA: RAR-related orphan receptor A                                                  | U04897    | 6095          | g451563      | <b>9,1</b>   | 0,000614 |
| 216841_s_at  | SOD2: superoxide dismutase 2, mitochondrial                                          | X15132    | 6648          | Hs.318885.1  | <b>9,05</b>  | 0,000627 |
| 1568768_s_at | BRE: brain and reproductive organ-expressed (TNFRSF1A modulator)                     | AW080339  | 9577          | Hs2.390621.1 | <b>8,9</b>   | 0,006655 |
| 210517_s_at  | AKAP12: A kinase (PRKA) anchor protein (gravin) 12                                   | AB003476  | 9590          | g2081606     | <b>8,79</b>  | 0,004854 |
| 228082_at    | ASAM: adipocyte-specific adhesion molecule                                           | BF056275  | 79827         | Hs.135121.0  | <b>8,67</b>  | 0,005955 |
| 201626_at    | INSIG1: insulin induced gene 1                                                       | BG292233  | 3638          | Hs.56205.0   | <b>8,14</b>  | 0,008763 |
| 205681_at    | BCL2A1: BCL2-related protein A1                                                      | NM_004049 | 597           | g4757839     | <b>8,14</b>  | 0,005796 |
| 226834_at    | Transcribed locus                                                                    | BG112263  |               | Hs.28462.0   | <b>7,94</b>  | 0,001846 |
| 209606_at    | PSCDBP: pleckstrin homology, Sec7 and coiled-coil domains, binding protein           | L06633    | 9595          | g431327      | <b>7,56</b>  | 0,000822 |
| 210664_s_at  | TFPI: tissue factor pathway inhibitor (lipoprotein-associated coagulation inhibitor) | AF021834  | 7035          | g4103170     | <b>7,49</b>  | 0,002818 |
| 226497_s_at  | CDNA FLJ35153 fis, clone PLACE6010765                                                | AA149648  |               | Hs.22968.0   | <b>7,48</b>  | 0,006645 |
| 201666_at    | TIMP1: TIMP metalloproteinase inhibitor 1                                            | NM_003254 | 7076          | g4507508     | <b>7,42</b>  | 0,009464 |
| 219155_at    | PITPNC1: phosphatidylinositol transfer protein, cytoplasmic 1                        | NM_012417 | 26207         | g6912623     | <b>7,18</b>  | 0,002508 |
| 201667_at    | GJA1: gap junction protein, alpha 1, 43kDa                                           | NM_000165 | 2697          | g4755136     | <b>7,15</b>  | 0,000745 |
| 1554283_at   | CCRN4L: CCR4 carbon catabolite repression 4-like ( <i>S. cerevisiae</i> )            | BC021963  | 25819         | Hs2.352352.1 | <b>7,09</b>  | 0,002046 |
| 227963_at    | Transcribed locus                                                                    | BF515913  |               | Hs.293354.0  | <b>6,97</b>  | 0,001069 |
| 217741_s_at  | ZFAND5: zinc finger, AN1-type domain 5                                               | AW471220  | 7763          | Hs.3776.0    | <b>6,95</b>  | 0,002953 |
| 221577_x_at  | GDF15: growth differentiation factor 15                                              | AF003934  | 9518          | g2290971     | <b>6,93</b>  | 0,00593  |
| 210029_at    | INDO: indoleamine-pyrrole 2,3 dioxygenase                                            | M34455    | 3620          | g185790      | <b>6,77</b>  | 0,004939 |
| 227337_at    | ANKRD37: ankyrin repeat domain 37                                                    | AA886870  | 353322        | Hs.107381.1  | <b>6,73</b>  | 0,00431  |
| 200800_s_at  | HSPA1A /// HSPA1B: heat shock 70kDa protein 1A /// heat shock 70kDa protein 1B       | NM_005345 | 3303 /// 3304 | g5579469     | <b>6,66</b>  | 0,004495 |
| 202948_at    | IL1R1: interleukin 1 receptor, type I                                                | NM_000877 | 3554          | g4504658     | <b>6,03</b>  | 0,00952  |
| 209386_at    | TM4SF1: transmembrane 4 L six family member 1                                        | AI346835  | 4071          | Hs.3337.0    | <b>5,99</b>  | 0,000549 |
| 201858_s_at  | SRGN: serglycin                                                                      | J03223    | 5552          | g190419      | <b>5,93</b>  | 0,009568 |
| 215446_s_at  | LOX: lysyl oxidase                                                                   | L16895    | 4015          | Hs.102267.3  | <b>5,78</b>  | 0,004408 |
| 212501_at    | CEBPB: CCAAT/enhancer binding protein (C/EBP), beta                                  | AL564683  | 1051          | Hs.99029.0   | <b>5,7</b>   | 0,007938 |
| 231766_s_at  | COL12A1: collagen, type XII, alpha 1                                                 | U73778    | 1303          | Hs.101302.0  | <b>5,7</b>   | 0,006859 |
| 203887_s_at  | THBD: thrombomodulin                                                                 | NM_000361 | 7056          | g4507482     | <b>5,66</b>  | 0,006192 |

Online Resource 1 - Comparison Control sample vs. DF samples

|             |                                                                                                                                               |           |                     |              |             |          |
|-------------|-----------------------------------------------------------------------------------------------------------------------------------------------|-----------|---------------------|--------------|-------------|----------|
| 206683_at   | ZNF165: zinc finger protein 165                                                                                                               | NM_003447 | 7718                | g4508000     | <b>5,66</b> | 0,004904 |
| 204271_s_at | EDNRB: endothelin receptor type B                                                                                                             | M74921    | 1910                | g182275      | <b>5,56</b> | 0,001755 |
| 1557257_at  | BCL10: B-cell CLL/lymphoma 10                                                                                                                 | AA994334  | 8915                | Hs2.135715.1 | <b>5,51</b> | 0,001428 |
| 212902_at   | SEC24A: SEC24 related gene family, member A (S. cerevisiae)                                                                                   | BE645231  | 10802               | Hs.211612.0  | <b>5,5</b>  | 0,000435 |
| 209544_at   | RIPK2: receptor-interacting serine-threonine kinase 2                                                                                         | AF027706  | 8767                | g3123886     | <b>5,46</b> | 0,005686 |
| 225265_at   | RBMS1: RNA binding motif, single stranded interacting protein 1                                                                               | AI580100  | 5937                | Hs.239870.1  | <b>5,45</b> | 0,001314 |
| 212813_at   | JAM3: junctional adhesion molecule 3                                                                                                          | AA149644  | 83700               | Hs.55016.1   | <b>5,34</b> | 0,001075 |
| 229414_at   | PITPNC1: phosphatidylinositol transfer protein, cytoplasmic 1                                                                                 | AI676095  | 26207               | Hs.30514.0   | <b>5,23</b> | 0,009742 |
| 36711_at    | MAFF: v-maf musculoaponeurotic fibrosarcoma oncogene homolog F (avian)                                                                        | AL021977  | 23764               | 4848734_RC   | <b>5,22</b> | 0,001453 |
| 212154_at   | SDC2: syndecan 2                                                                                                                              | AI380298  | 6383                | Hs.1501.0    | <b>5,19</b> | 0,009799 |
| 226034_at   | Homo sapiens, clone IMAGE:3881549, mRNA                                                                                                       | BE222344  |                     | Hs.166975.4  | <b>4,94</b> | 0,000361 |
| 205193_at   | MAFF: v-maf musculoaponeurotic fibrosarcoma oncogene homolog F (avian)                                                                        | NM_012323 | 23764               | g6912489     | <b>4,92</b> | 0,007278 |
| 224215_s_at | DLL1: delta-like 1 (Drosophila)                                                                                                               | AF196571  | 28514               | g6180181     | <b>4,92</b> | 0,008734 |
| 204298_s_at | LOX: lysyl oxidase                                                                                                                            | NM_002317 | 4015                | g4505008     | <b>4,86</b> | 0,006232 |
| 226347_at   | Hs.268231.0                                                                                                                                   | AI754928  |                     | Hs.268231.0  | <b>4,84</b> | 0,000702 |
| 213943_at   | TWIST1: twist homolog 1 (acrocephalosyndactyly 3; Saethre-Chotzen syndrome) (Drosophila)                                                      | X99268    | 7291                | Hs.66744.0   | <b>4,82</b> | 0,007531 |
| 212758_s_at | ZEB1: zinc finger E-box binding homeobox 1                                                                                                    | AI373166  | 6935                | Hs.232068.2  | <b>4,77</b> | 0,007637 |
| 204363_at   | F3: coagulation factor III (thromboplastin, tissue factor)                                                                                    | NM_001993 | 2152                | g10518499    | <b>4,76</b> | 0,002975 |
| 212764_at   | ZEB1: zinc finger E-box binding homeobox 1                                                                                                    | AI806174  | 6935                | Hs.232068.2  | <b>4,76</b> | 0,000532 |
| 215806_x_at | TARP /// TRGC2 /// TRGV9: T cell receptor gamma constant 2 /// T cell receptor gamma variable 9 /// TCR gamma alternate reading frame protein | M13231    | 445347 /// 6967 /// | Hs.274509.1  | <b>4,63</b> | 0,008402 |
| 201170_s_at | BHLHB2: basic helix-loop-helix domain containing, class B, 2                                                                                  | NM_003670 | 8553                | g4503298     | <b>4,6</b>  | 0,006134 |
| 213415_at   | CLIC2: chloride intracellular channel 2                                                                                                       | AI768628  | 1193                | Hs.54570.0   | <b>4,56</b> | 0,003295 |
| 221881_s_at | CLIC4: chloride intracellular channel 4                                                                                                       | AI638420  | 25932               | Hs.25035.1   | <b>4,55</b> | 0,003947 |
| 209191_at   | TUBB6: tubulin, beta 6                                                                                                                        | BC002654  | 84617               | g12803638    | <b>4,54</b> | 0,002421 |
| 209882_at   | RIT1: Ras-like without CAAX 1                                                                                                                 | AF084462  | 6016                | g4234917     | <b>4,52</b> | 0,005573 |
| 200788_s_at | PEA15: phosphoprotein enriched in astrocytes 15                                                                                               | NM_003768 | 8682                | g4505704     | <b>4,47</b> | 0,002449 |
| 209355_s_at | PPAP2B: phosphatidic acid phosphatase type 2B                                                                                                 | AB000889  | 8613                | g2467299     | <b>4,44</b> | 0,007166 |
| 203574_at   | NFIL3: nuclear factor, interleukin 3 regulated                                                                                                | NM_005384 | 4783                | g4885516     | <b>4,42</b> | 0,001073 |
| 213258_at   | TFPI: tissue factor pathway inhibitor (lipoprotein-associated coagulation inhibitor)                                                          | BF511231  | 7035                | Hs.288582.0  | <b>4,42</b> | 0,004053 |
| 220330_s_at | SAMSN1: SAM domain, SH3 domain and nuclear localization signals 1                                                                             | NM_022136 | 64092               | g11545870    | <b>4,41</b> | 0,008911 |
| 214247_s_at | DKK3: dickkopf homolog 3 (Xenopus laevis)                                                                                                     | AU148057  | 27122               | Hs.278503.1  | <b>4,39</b> | 0,005787 |
| 213310_at   | EIF2C2: Eukaryotic translation initiation factor 2C, 2                                                                                        | AI613483  | 27161               | Hs.324504.1  | <b>4,36</b> | 0,007043 |

Online Resource 1 - Comparison Control sample vs. DF samples

|             |                                                                                                                                                                |           |                |             |             |          |
|-------------|----------------------------------------------------------------------------------------------------------------------------------------------------------------|-----------|----------------|-------------|-------------|----------|
| 201881_s_at | ARIH1: ariadne homolog, ubiquitin-conjugating enzyme E2 binding protein, 1 (Drosophila)                                                                        | NM_005744 | 25820          | g9966762    | <b>4,34</b> | 0,005564 |
| 202129_s_at | RIOK3: RIO kinase 3 (yeast)                                                                                                                                    | AW006290  | 8780           | Hs.209061.0 | <b>4,34</b> | 0,000698 |
| 204698_at   | ISG20: interferon stimulated exonuclease gene 20kDa                                                                                                            | NM_002201 | 3669           | g6857799    | <b>4,34</b> | 0,005161 |
| 219540_at   | ZNF267: zinc finger protein 267                                                                                                                                | AU150728  | 10308          | Hs.145498.0 | <b>4,31</b> | 0,003077 |
| 210260_s_at | TNFAIP8: tumor necrosis factor, alpha-induced protein 8                                                                                                        | BC005352  | 25816          | g13529163   | <b>4,25</b> | 0,001561 |
| 243918_at   | Transcribed locus                                                                                                                                              | AI459554  |                | Hs.161286.0 | <b>4,2</b>  | 0,004997 |
| 212689_s_at | JMJD1A: jumonji domain containing 1A                                                                                                                           | AA524505  | 55818          | Hs.321707.0 | <b>4,18</b> | 0,006977 |
| 201300_s_at | PRNP: prion protein (p27-30) (Creutzfeldt-Jakob disease, Gerstmann-Strausler-Scheinker syndrome, fatal familial insomnia)                                      | NM_000311 | 5621           | g4506112    | <b>4,16</b> | 0,005317 |
| 212196_at   | IL6ST: Interleukin 6 signal transducer (gp130, oncostatin M receptor)                                                                                          | AW242916  | 3572           | Hs.71968.0  | <b>4,16</b> | 0,003375 |
| 227080_at   | ZNF697: zinc finger protein 697                                                                                                                                | AW003092  | 90874          | Hs.22437.0  | <b>4,16</b> | 0,001601 |
| 208296_x_at | TNFAIP8: tumor necrosis factor, alpha-induced protein 8                                                                                                        | NM_014350 | 25816          | g7657123    | <b>4,15</b> | 0,004896 |
| 219134_at   | ELTD1: EGF, latrophilin and seven transmembrane domain containing 1                                                                                            | NM_022159 | 64123          | g11545907   | <b>4,15</b> | 0,002081 |
| 205014_at   | FGFBP1: fibroblast growth factor binding protein 1                                                                                                             | NM_005130 | 9982           | g4826753    | <b>4,14</b> | 0,009759 |
| 206577_at   | VIP: vasoactive intestinal peptide                                                                                                                             | NM_003381 | 7432           | g4507896    | <b>4,12</b> | 0,00875  |
| 225557_at   | AXUD1: AXIN1 up-regulated 1                                                                                                                                    | AI091372  | 64651          | Hs.6607.0   | <b>4,11</b> | 0,002849 |
| 226348_at   | Hs.268231.0                                                                                                                                                    | AK026764  |                | Hs.268231.0 | <b>4,11</b> | 0,000278 |
| 222033_s_at | FLT1: Fms-related tyrosine kinase 1 (vascular endothelial growth factor/vascular permeability factor receptor)                                                 | AA058828  | 2321           | Hs.138671.2 | <b>4,09</b> | 0,003331 |
| 212646_at   | RFTN1: raftlin, lipid raft linker 1                                                                                                                            | D42043    | 23180          | Hs.79123.1  | <b>4,03</b> | 0,000803 |
| 210538_s_at | BIRC3: baculoviral IAP repeat-containing 3                                                                                                                     | U37546    | 330            | g1145290    | <b>4,02</b> | 0,003457 |
| 226633_at   | RAB8B: RAB8B, member RAS oncogene family                                                                                                                       | AI807023  | 51762          | Hs.95388.0  | <b>3,97</b> | 0,004072 |
| 201147_s_at | TIMP3: TIMP metalloproteinase inhibitor 3 (Sorsby fundus dystrophy, pseudoinflammatory)                                                                        | BF347089  | 7078           | Hs.245188.0 | <b>3,96</b> | 0,00443  |
| 201878_at   | ARIH1: ariadne homolog, ubiquitin-conjugating enzyme E2 binding protein, 1 (Drosophila)                                                                        | N25546    | 25820          | Hs.181461.0 | <b>3,89</b> | 0,000355 |
| 205239_at   | AREG /// LOC727738: amphiregulin (schwannoma-derived growth factor) /// similar to Amphiregulin precursor (AR) (Colorectum cell-derived growth factor) (CRDGF) | NM_001657 | 374 /// 727738 | g4502198    | <b>3,88</b> | 0,003812 |
| 222343_at   | BCL2L11: BCL2-like 11 (apoptosis facilitator)                                                                                                                  | AA629050  | 10018          | Hs.50760.0  | <b>3,88</b> | 0,002542 |
| 202842_s_at | DNAJB9: DnaJ (Hsp40) homolog, subfamily B, member 9                                                                                                            | AL080081  | 4189           | g5262493    | <b>3,87</b> | 0,003024 |
| 201865_x_at | NR3C1: nuclear receptor subfamily 3, group C, member 1 (glucocorticoid receptor)                                                                               | AI432196  | 2908           | Hs.75772.0  | <b>3,78</b> | 0,009133 |
| 202202_s_at | LAMA4: laminin, alpha 4                                                                                                                                        | NM_002290 | 3910           | g9845494    | <b>3,78</b> | 0,008419 |
| 201105_at   | LGALS1: lectin, galactoside-binding, soluble, 1 (galectin 1)                                                                                                   | NM_002305 | 3956           | g6006015    | <b>3,77</b> | 0,006336 |
| 227099_s_at | LOC387763: hypothetical LOC387763                                                                                                                              | AW276078  | 387763         | Hs.127824.0 | <b>3,76</b> | 0,004533 |
| 215127_s_at | RBMS1: RNA binding motif, single stranded interacting protein 1                                                                                                | AL517946  | 5937           | Hs.241567.3 | <b>3,75</b> | 0,007578 |

Online Resource 1 - Comparison Control sample vs. DF samples

|              |                                                                                                              |           |        |             |             |          |
|--------------|--------------------------------------------------------------------------------------------------------------|-----------|--------|-------------|-------------|----------|
| 219489_s_at  | NXN: nucleoredoxin                                                                                           | NM_017821 | 64359  | g8923408    | <b>3,72</b> | 0,006188 |
| 201250_s_at  | SLC2A1: solute carrier family 2 (facilitated glucose transporter), member 1                                  | NM_006516 | 6513   | g5730050    | <b>3,71</b> | 0,006447 |
| 205932_s_at  | MSX1: msh homeobox 1                                                                                         | NM_002448 | 4487   | g4505266    | <b>3,71</b> | 0,008203 |
| 218268_at    | TBC1D15: TBC1 domain family, member 15                                                                       | NM_022771 | 64786  | g12232450   | <b>3,71</b> | 0,000989 |
| 225698_at    | C5orf26: chromosome 5 open reading frame 26                                                                  | BF314746  | 114915 | Hs.12082.0  | <b>3,71</b> | 0,008224 |
| 224657_at    | ERRFI1: ERBB receptor feedback inhibitor 1                                                                   | AL034417  | 54206  | Hs.11169.2  | <b>3,69</b> | 0,000093 |
| 201761_at    | MTHFD2: methylenetetrahydrofolate dehydrogenase (NADP+ dependent) 2, methenyltetrahydrofolate cyclohydrolase | NM_006636 | 10797  | g13699869   | <b>3,67</b> | 0,007627 |
| 209060_x_at  | NCOA3: nuclear receptor coactivator 3                                                                        | Ai438999  | 8202   | Hs.225977.1 | <b>3,66</b> | 0,002962 |
| 201616_s_at  | CALD1: caldesmon 1                                                                                           | AL577531  | 800    | Hs.325474.0 | <b>3,64</b> | 0,009343 |
| 205453_at    | HOXB2: homeobox B2                                                                                           | NM_002145 | 3212   | g4504464    | <b>3,64</b> | 0,0065   |
| 201860_s_at  | PLAT: plasminogen activator, tissue                                                                          | NM_000930 | 5327   | g4505860    | <b>3,61</b> | 0,006044 |
| 218871_x_at  | GALNACT-2: chondroitin sulfate GalNAcT-2                                                                     | NM_018590 | 55454  | g8923965    | <b>3,61</b> | 0,008641 |
| 217028_at    | CXCR4: chemokine (C-X-C motif) receptor 4                                                                    | AJ224869  | 7852   | Hs.89414.1  | <b>3,6</b>  | 0,004842 |
| 218723_s_at  | C13orf15: chromosome 13 open reading frame 15                                                                | NM_014059 | 28984  | g7662650    | <b>3,6</b>  | 0,005398 |
| 204194_at    | BACH1: BTB and CNC homology 1, basic leucine zipper transcription factor 1                                   | NM_001186 | 571    | g4502352    | <b>3,59</b> | 0,008108 |
| 222989_s_at  | UBQLN1: ubiquilin 1                                                                                          | NM_013438 | 29979  | Hs.9589.0   | <b>3,56</b> | 0,002118 |
| 223310_x_at  | PNPLA8: patatin-like phospholipase domain containing 8                                                       | AF217519  | 50640  | g7688980    | <b>3,55</b> | 0,006044 |
| 1555355_a_at | ETS1: v-ets erythroblastosis virus E26 oncogene homolog 1 (avian)                                            | BC017314  | 2113   | Hs2.18063.2 | <b>3,52</b> | 0,009753 |
| 205349_at    | GNA15: guanine nucleotide binding protein (G protein), alpha 15 (Gq class)                                   | NM_002068 | 2769   | g4504038    | <b>3,51</b> | 0,004418 |
| 204284_at    | PPP1R3C: protein phosphatase 1, regulatory (inhibitor) subunit 3C                                            | N26005    | 5507   | Hs.303090.0 | <b>3,43</b> | 0,009448 |
| 228080_at    | LAYN: layilin                                                                                                | BE856341  | 143903 | Hs.133015.0 | <b>3,39</b> | 0,008871 |
| 203499_at    | EPHA2: EPH receptor A2                                                                                       | NM_004431 | 1969   | g4758277    | <b>3,33</b> | 0,007549 |
| 211764_s_at  | UBE2D1: ubiquitin-conjugating enzyme E2D 1 (UBC4/5 homolog, yeast)                                           | BC005980  | 7321   | g13543662   | <b>3,33</b> | 0,006007 |
| 218472_s_at  | PELO: pelota homolog (Drosophila)                                                                            | NM_015946 | 53918  | g7705599    | <b>3,24</b> | 0,007529 |
| 205269_at    | LCP2: lymphocyte cytosolic protein 2 (SH2 domain containing leukocyte protein of 76kDa)                      | Ai123251  | 3937   | Hs.2488.0   | <b>3,23</b> | 0,002939 |
| 212722_s_at  | JMJD6: jumonji domain containing 6                                                                           | AK021780  | 23210  | Hs.72660.0  | <b>3,21</b> | 0,009956 |
| 202286_s_at  | TACSTD2: tumor-associated calcium signal transducer 2                                                        | J04152    | 4070   | Hs.23582.0  | <b>3,18</b> | 0,004999 |
| 202670_at    | MAP2K1: mitogen-activated protein kinase kinase 1                                                            | Ai571419  | 5604   | Hs.3446.0   | <b>3,15</b> | 0,002213 |
| 208290_s_at  | EIF5: eukaryotic translation initiation factor 5                                                             | NM_001969 | 1983   | g4503542    | <b>3,15</b> | 0,008403 |
| 202208_s_at  | ARL4C: ADP-ribosylation factor-like 4C                                                                       | BC001051  | 10123  | g12654450   | <b>3,11</b> | 0,004748 |
| 222763_s_at  | WDR33: WD repeat domain 33                                                                                   | AW161711  | 55339  | Hs.48541.0  | <b>3,11</b> | 0,005599 |

Online Resource 1 - Comparison Control sample vs. DF samples

|             |                                                                                                                                              |           |               |              |             |          |
|-------------|----------------------------------------------------------------------------------------------------------------------------------------------|-----------|---------------|--------------|-------------|----------|
| 200669_s_at | UBE2D2 /// UBE2D3: ubiquitin-conjugating enzyme E2D 2 (UBC4/5 homolog, yeast) /// ubiquitin-conjugating enzyme E2D 3 (UBC4/5 homolog, yeast) | NM_003340 | 7322 /// 7323 | g4507776     | <b>3,1</b>  | 0,000683 |
| 203313_s_at | TGIF1: TGFB-induced factor homeobox 1                                                                                                        | NM_003244 | 7050          | g4507472     | <b>3,08</b> | 0,007673 |
| 222792_s_at | CCDC59: coiled-coil domain containing 59                                                                                                     | AI201880  | 29080         | Hs.90527.0   | <b>3,05</b> | 0,006708 |
| 1554149_at  | CLDND1: claudin domain containing 1                                                                                                          | BC013610  | 56650         | Hs2.107393.2 | <b>3,04</b> | 0,003903 |
| 208433_s_at | LRP8: low density lipoprotein receptor-related protein 8, apolipoprotein e receptor                                                          | NM_017522 | 7804          | g8923799     | <b>3,01</b> | 0,007139 |
| 225803_at   | FBXO32: F-box protein 32                                                                                                                     | AW006123  | 114907        | Hs.61661.0   | <b>3,01</b> | 0,001405 |
| 210236_at   | PPFIA1: protein tyrosine phosphatase, receptor type, f polypeptide (PTPRF), interacting protein (liprin), alpha 1                            | U22815    | 8500          | g930340      | <b>2,99</b> | 0,003277 |
| 202558_s_at | STCH: stress 70 protein chaperone, microsomal-associated, 60kDa                                                                              | NM_006948 | 6782          | g5902125     | <b>2,98</b> | 0,009532 |
| 204337_at   | RGS4: regulator of G-protein signaling 4                                                                                                     | AL514445  | 5999          | Hs.227571.0  | <b>2,98</b> | 0,00752  |
| 205180_s_at | ADAM8: ADAM metalloproteinase domain 8                                                                                                       | NM_001109 | 101           | g4557252     | <b>2,97</b> | 0,007672 |
| 221482_s_at | ARPP-19: cyclic AMP phosphoprotein, 19 kD                                                                                                    | BC003418  | 10776         | g13097335    | <b>2,94</b> | 0,007422 |
| 219474_at   | C3orf52: chromosome 3 open reading frame 52                                                                                                  | NM_024616 | 79669         | g13375833    | <b>2,93</b> | 0,001776 |
| 230258_at   | GLIS3: GLIS family zinc finger 3                                                                                                             | AI277316  | 169792        | Hs.107924.0  | <b>2,92</b> | 0,007393 |
| 210074_at   | CTSL2: cathepsin L2                                                                                                                          | AF070448  | 1515          | g3228671     | <b>2,91</b> | 0,005616 |
| 221763_at   | JMJD1C: jumonji domain containing 1C                                                                                                         | AI694023  | 221037        | Hs.6685.0    | <b>2,86</b> | 0,000433 |
| 223586_at   | ARNTL2: aryl hydrocarbon receptor nuclear translocator-like 2                                                                                | AF256215  | 56938         | g11345222    | <b>2,86</b> | 0,009433 |
| 225034_at   | LOC286167: hypothetical protein LOC286167                                                                                                    | AI885015  | 286167        | Hs.293696.0  | <b>2,85</b> | 0,005581 |
| 221510_s_at | GLS: glutaminase                                                                                                                             | AF158555  | 2744          | g5690371     | <b>2,82</b> | 0,004562 |
| 205013_s_at | ADORA2A: adenosine A2a receptor                                                                                                              | NM_000675 | 135           | g5921991     | <b>2,81</b> | 0,00599  |
| 200598_s_at | HSP90B1: heat shock protein 90kDa beta (Grp94), member 1                                                                                     | AI582238  | 7184          | Hs.82689.0   | <b>2,8</b>  | 0,007257 |
| 204491_at   | PDE4D: phosphodiesterase 4D, cAMP-specific (phosphodiesterase E3 dunce homolog, Drosophila)                                                  | R40917    | 5144          | Hs.172081.0  | <b>2,78</b> | 0,001135 |
| 205270_s_at | LCP2: lymphocyte cytosolic protein 2 (SH2 domain containing leukocyte protein of 76kDa)                                                      | NM_005565 | 3937          | g7382491     | <b>2,75</b> | 0,006386 |
| 226991_at   | NFATC2: Nuclear factor of activated T-cells, cytoplasmic, calcineurin-dependent 2                                                            | AA489681  | 4773          | Hs.102248.0  | <b>2,72</b> | 0,009195 |
| 202006_at   | PTPN12: protein tyrosine phosphatase, non-receptor type 12                                                                                   | NM_002835 | 5782          | g4506286     | <b>2,71</b> | 0,005359 |
| 212588_at   | PTPRC: protein tyrosine phosphatase, receptor type, C                                                                                        | Y00062    | 5788          | Hs.170121.1  | <b>2,69</b> | 0,005448 |
| 201844_s_at | RYBP: RING1 and YY1 binding protein                                                                                                          | W84482    | 23429         | Hs.7910.0    | <b>2,68</b> | 0,005257 |
| 202693_s_at | STK17A: serine/threonine kinase 17a                                                                                                          | AW194730  | 9263          | Hs.9075.0    | <b>2,68</b> | 0,005441 |
| 213003_s_at | CEBPD: CCAAT/enhancer binding protein (C/EBP), delta                                                                                         | BF061054  | 1052          | Hs.76722.1   | <b>2,68</b> | 0,006724 |
| 202769_at   | CCNG2: cyclin G2                                                                                                                             | AW134535  | 901           | Hs.79069.0   | <b>2,66</b> | 0,00813  |
| 226863_at   | FAM110C: family with sequence similarity 110, member C                                                                                       | AI674565  | 642273        | Hs.8379.0    | <b>2,66</b> | 0,001469 |
| 203973_s_at | CEBPD: CCAAT/enhancer binding protein (C/EBP), delta                                                                                         | NM_005195 | 1052          | g4885130     | <b>2,65</b> | 0,002806 |

Online Resource 1 - Comparison Control sample vs. DF samples

|              |                                                                                                                                                                                                                  |           |                   |              |             |          |
|--------------|------------------------------------------------------------------------------------------------------------------------------------------------------------------------------------------------------------------|-----------|-------------------|--------------|-------------|----------|
| 200868_s_at  | ZNF313: zinc finger protein 313                                                                                                                                                                                  | NM_018683 | 55905             | g8923897     | <b>2,63</b> | 0,002712 |
| 209306_s_at  | SWAP70: SWAP-70 protein                                                                                                                                                                                          | AI139569  | 23075             | Hs.153026.0  | <b>2,59</b> | 0,001975 |
| 214866_at    | PLAUR: plasminogen activator, urokinase receptor                                                                                                                                                                 | X74039    | 5329              | Hs.179657.2  | <b>2,59</b> | 0,006346 |
| 222548_s_at  | MAP4K4: mitogen-activated protein kinase kinase kinase 4                                                                                                                                                         | AL561281  | 9448              | Hs.6631.0    | <b>2,59</b> | 0,003305 |
| 225032_at    | FNDC3B: fibronectin type III domain containing 3B                                                                                                                                                                | AI141784  | 64778             | Hs.299883.1  | <b>2,56</b> | 0,001325 |
| 209481_at    | SNRK: SNF related kinase                                                                                                                                                                                         | AF226044  | 54861             | g9295326     | <b>2,55</b> | 0,006101 |
| 227200_at    | Hs.105636.0                                                                                                                                                                                                      | AI871408  |                   | Hs.105636.0  | <b>2,55</b> | 0,009548 |
| 225750_at    | CDNA FLJ14162 fis, clone NT2RM4002504                                                                                                                                                                            | BE966748  |                   | Hs.10949.0   | <b>2,54</b> | 0,004894 |
| 200985_s_at  | CD59: CD59 molecule, complement regulatory protein                                                                                                                                                               | NM_000611 | 966               | g10835164    | <b>2,52</b> | 0,002276 |
| 212365_at    | MYO1B: myosin IB                                                                                                                                                                                                 | BF215996  | 4430              | Hs.121576.0  | <b>2,5</b>  | 0,00573  |
| 227371_at    | BAIAP2L1: BAI1-associated protein 2-like 1                                                                                                                                                                       | AA496034  | 55971             | Hs.23449.1   | <b>2,5</b>  | 0,006517 |
| 203108_at    | GPRC5A: G protein-coupled receptor, family C, group 5, member A                                                                                                                                                  | NM_003979 | 9052              | g12056470    | <b>2,49</b> | 0,006935 |
| 201325_s_at  | EMP1: epithelial membrane protein 1                                                                                                                                                                              | NM_001423 | 2012              | g4503558     | <b>2,48</b> | 0,002734 |
| 209501_at    | CDR2: cerebellar degeneration-related protein 2, 62kDa                                                                                                                                                           | AL582414  | 1039              | Hs.75124.0   | <b>2,47</b> | 0,000957 |
| 223611_s_at  | LNK1: ligand of numb-protein X 1                                                                                                                                                                                 | AI738919  | 84708             | Hs.66295.1   | <b>2,47</b> | 0,008215 |
| 205100_at    | GFPT2: glutamine-fructose-6-phosphate transaminase 2                                                                                                                                                             | NM_005110 | 9945              | g4826741     | <b>2,46</b> | 0,006286 |
| 219774_at    | CCDC93: coiled-coil domain containing 93                                                                                                                                                                         | NM_019044 | 54520             | g9506632     | <b>2,46</b> | 0,001265 |
| 222602_at    | UBE1L2: ubiquitin-activating enzyme E1-like 2                                                                                                                                                                    | AW296050  | 55236             | Hs.59838.0   | <b>2,45</b> | 0,007434 |
| 223070_at    | SELK: selenoprotein K                                                                                                                                                                                            | AF085359  | 58515             | g5114052     | <b>2,45</b> | 0,00861  |
| 201266_at    | TXNRD1: thioredoxin reductase 1                                                                                                                                                                                  | NM_003330 | 7296              | g4507746     | <b>2,42</b> | 0,004514 |
| 208936_x_at  | LGALS8: lectin, galactoside-binding, soluble, 8 (galectin 8)                                                                                                                                                     | AF074000  | 3964              | g5577965     | <b>2,41</b> | 0,006612 |
| 200799_at    | HSPA1A: heat shock 70kDa protein 1A                                                                                                                                                                              | NM_005345 | 3303              | g5579469     | <b>2,4</b>  | 0,001112 |
| 201830_s_at  | NET1: neuroepithelial cell transforming gene 1                                                                                                                                                                   | NM_005863 | 10276             | g5031938     | <b>2,38</b> | 0,000339 |
| 226153_s_at  | CNOT6L: CCR4-NOT transcription complex, subunit 6-like                                                                                                                                                           | AW514857  | 246175            | Hs.183085.0  | <b>2,38</b> | 0,008171 |
| 230156_x_at  | CHD2: Chromodomain helicase DNA binding protein 2                                                                                                                                                                | AI933049  | 1106              | Hs.287864.0  | <b>2,38</b> | 0,004532 |
| 211458_s_at  | GABARAPL1 /// GABARAPL3: GABA(A) receptor-associated protein like 1 /// GABA(A) receptors associated protein like 3                                                                                              | AF180519  | 23710 /// 23766   | g13241283    | <b>2,34</b> | 0,00569  |
| 218319_at    | PEL1: pellino homolog 1 (Drosophila)                                                                                                                                                                             | NM_020651 | 57162             | g11037062    | <b>2,34</b> | 0,007093 |
| 226227_x_at  | C20orf199 /// TALDO1: transaldolase 1 /// chromosome 20 open reading frame 199                                                                                                                                   | BF185165  | 441951 /// 6888   | Hs.284158.4  | <b>2,33</b> | 0,003824 |
| 1557055_s_at | LOC643837: hypothetical protein LOC643837                                                                                                                                                                        | BC042880  | 643837            | Hs2.436154.1 | <b>2,33</b> | 0,005924 |
| 212241_at    | Gcom1 /// GRINL1A /// LOC339970: glutamate receptor, ionotropic, N-methyl D-aspartate-like 1A /// GRINL1A combined protein /// similar to glutamate receptor, ionotropic, N-methyl D-aspartate-like 1A isoform 1 | AI632774  | 145781 /// 339970 | Hs.6283.0    | <b>2,32</b> | 0,009382 |
| 224967_at    | UGCG: UDP-glucose ceramide glucosyltransferase                                                                                                                                                                   | W72338    | 7357              | Hs.23703.0   | <b>2,32</b> | 0,007458 |

Online Resource 1 - Comparison Control sample vs. DF samples

|              |                                                                                                          |           |                 |              |              |          |
|--------------|----------------------------------------------------------------------------------------------------------|-----------|-----------------|--------------|--------------|----------|
| 224915_x_at  | C20orf199 /// TALDO1: transaldolase 1 /// chromosome 20 open reading frame 199                           | AV756131  | 441951 /// 6888 | Hs.284158.1  | <b>2,31</b>  | 0,003834 |
| 201862_s_at  | LRRFIP1: leucine rich repeat (in FLII) interacting protein 1                                             | NM_004735 | 9208            | g4758689     | <b>2,3</b>   | 0,003027 |
| 209102_s_at  | HBP1: HMG-box transcription factor 1                                                                     | AF019214  | 26959           | g2460168     | <b>2,29</b>  | 0,002986 |
| 219426_at    | EIF2C3: eukaryotic translation initiation factor 2C, 3                                                   | NM_024852 | 192669          | g13376274    | <b>2,22</b>  | 0,009136 |
| 202949_s_at  | FHL2: four and a half LIM domains 2                                                                      | NM_001450 | 2274            | g4503722     | <b>2,15</b>  | 0,004854 |
| 203542_s_at  | KLF9: Kruppel-like factor 9                                                                              | AI690205  | 687             | Hs.150557.0  | <b>2,13</b>  | 0,007894 |
| 208093_s_at  | NDEL1: nudE nuclear distribution gene E homolog (A. nidulans)-like 1                                     | NM_030808 | 81565           | g13540599    | <b>2,11</b>  | 0,006112 |
| 214438_at    | HLX: H2.0-like homeobox                                                                                  | M60721    | 3142            | Hs.74870.0   | <b>2,1</b>   | 0,008139 |
| 201984_s_at  | EGFR: epidermal growth factor receptor (erythroblastic leukemia viral (v-erb-b) oncogene homolog, avian) | NM_005228 | 1956            | g4885198     | <b>2,09</b>  | 0,008883 |
| 217834_s_at  | SYNCRIP: synaptotagmin binding, cytoplasmic RNA interacting protein                                      | NM_006372 | 10492           | g5453805     | <b>2,08</b>  | 0,006848 |
| 211969_at    | HSP90AA1: heat shock protein 90kDa alpha (cytosolic), class A member 1                                   | BG420237  | 3320            | Hs.289088.4  | <b>2,05</b>  | 0,007843 |
| 1569030_s_at | NUB1: negative regulator of ubiquitin-like proteins 1                                                    | BC034716  | 51667           | Hs2.380685.2 | <b>1,99</b>  | 0,001811 |
| 204601_at    | N4BP1: Nedd4 binding protein 1                                                                           | NM_014664 | 9683            | g7662203     | <b>1,97</b>  | 0,001577 |
| 205263_at    | BCL10: B-cell CLL/lymphoma 10                                                                            | AF082283  | 8915            | g4092066     | <b>1,96</b>  | 0,004385 |
| 212008_at    | UBXD2: UBX domain containing 2                                                                           | N29889    | 23190           | Hs.77495.0   | <b>1,96</b>  | 0,006132 |
| 224956_at    | NUFIP2: nuclear fragile X mental retardation protein interacting protein 2                               | AI743689  | 57532           | Hs.24336.0   | <b>1,95</b>  | 0,00989  |
| 212900_at    | SEC24A: SEC24 related gene family, member A (S. cerevisiae)                                              | AJ131244  | 10802           | Hs.211612.0  | <b>1,94</b>  | 0,000982 |
| 200984_s_at  | CD59: CD59 molecule, complement regulatory protein                                                       | X16447    | 966             | Hs.119663.0  | <b>1,93</b>  | 0,002762 |
| 227408_s_at  | SNX25: sorting nexin 25                                                                                  | AW008976  | 83891           | Hs.42768.2   | <b>1,92</b>  | 0,003327 |
| 200919_at    | PHC2: polyhomeotic homolog 2 (Drosophila)                                                                | NM_004427 | 1912            | g4758241     | <b>1,9</b>   | 0,006242 |
| 221654_s_at  | USP3: ubiquitin specific peptidase 3                                                                     | AF077040  | 9960            | g4689127     | <b>1,8</b>   | 0,004615 |
| 200958_s_at  | SDCBP: syndecan binding protein (syntenin)                                                               | NM_005625 | 6386            | g5032082     | <b>1,78</b>  | 0,003583 |
| 232033_at    | USP37: ubiquitin specific peptidase 37                                                                   | BE670098  | 57695           | Hs.324696.0  | <b>1,77</b>  | 0,007972 |
| 201845_s_at  | RYBP: RING1 and YY1 binding protein                                                                      | AB029551  | 23429           | g6714542     | <b>1,75</b>  | 0,002653 |
| 200694_s_at  | DDX24: DEAD (Asp-Glu-Ala-Asp) box polypeptide 24                                                         | NM_020414 | 57062           | g13787212    | <b>1,71</b>  | 0,003422 |
| 177_at       | PLD1: phospholipase D1, phosphatidylcholine-specific                                                     | U38545    | 5337            | U38545       | <b>-1,79</b> | 0,00571  |
| 228959_at    | CDNA clone IMAGE:5262734                                                                                 | AI676241  |                 | Hs.296031.0  | <b>-1,82</b> | 0,004494 |
| 203775_at    | SLC25A13: solute carrier family 25, member 13 (citrin)                                                   | NM_014251 | 10165           | g7657580     | <b>-1,84</b> | 0,005585 |
| 227116_at    | Transcribed locus                                                                                        | AI934828  |                 | Hs.190044.0  | <b>-1,85</b> | 0,007773 |
| 218313_s_at  | GALNT7: UDP-N-acetyl-alpha-D-galactosamine:polypeptide N-acetylgalactosaminyltransferase 7 (GalNAc-T7)   | NM_017423 | 51809           | g8393408     | <b>-1,89</b> | 0,004957 |
| 208920_at    | SRI: sorcin                                                                                              | AV752215  | 6717            | Hs.300741.0  | <b>-1,93</b> | 0,004063 |
| 202850_at    | ABCD3: ATP-binding cassette, sub-family D (ALD), member 3                                                | NM_002858 | 5825            | g10947125    | <b>-1,95</b> | 0,003292 |



Online Resource 1 - Comparison Control sample vs. DF samples

|             |                                                                                                                                                     |           |        |              |              |          |
|-------------|-----------------------------------------------------------------------------------------------------------------------------------------------------|-----------|--------|--------------|--------------|----------|
| 218138_at   | MKKS: McKusick-Kaufman syndrome                                                                                                                     | NM_018848 | 8195   | g9055271     | <b>-1,95</b> | 0,005579 |
| 224596_at   | SLC44A1: solute carrier family 44, member 1                                                                                                         | AI634866  | 23446  | Hs.179902.1  | <b>-1,97</b> | 0,006011 |
| 244052_at   | CBR4: carbonyl reductase 4                                                                                                                          | AI469277  | 84869  | Hs.128016.0  | <b>-1,97</b> | 0,009068 |
| 209385_s_at | PROSC: proline synthetase co-transcribed homolog (bacterial)                                                                                        | AL136616  | 11212  | g12052757    | <b>-1,99</b> | 0,008512 |
| 203359_s_at | MYCBP: c-myc binding protein                                                                                                                        | AL525412  | 26292  | Hs.78221.0   | <b>-2,02</b> | 0,007442 |
| 209459_s_at | ABAT: 4-aminobutyrate aminotransferase                                                                                                              | AF237813  | 18     | g9963907     | <b>-2,08</b> | 0,007911 |
| 203974_at   | HDHD1A: haloacid dehalogenase-like hydrolase domain containing 1A                                                                                   | NM_012080 | 8226   | g6912345     | <b>-2,09</b> | 0,008874 |
| 239363_at   | Transcribed locus                                                                                                                                   | BE328720  |        | Hs.280651.0  | <b>-2,11</b> | 0,005038 |
| 218888_s_at | NETO2: neuropilin (NRP) and tolloid (TLL)-like 2                                                                                                    | NM_018092 | 81831  | g8922419     | <b>-2,15</b> | 0,007655 |
| 202772_at   | HMGCL: 3-hydroxymethyl-3-methylglutaryl-Coenzyme A lyase (hydroxymethylglutaricaciduria)                                                            | NM_000191 | 3155   | g4504426     | <b>-2,19</b> | 0,008995 |
| 219547_at   | COX15: COX15 homolog, cytochrome c oxidase assembly protein (yeast)                                                                                 | NM_004376 | 1355   | g4758035     | <b>-2,21</b> | 0,005642 |
| 220161_s_at | EPB41L4B: erythrocyte membrane protein band 4.1 like 4B                                                                                             | NM_019114 | 54566  | g9506568     | <b>-2,25</b> | 0,007866 |
| 229426_at   | COX5A: cytochrome c oxidase subunit Va                                                                                                              | BF196691  | 9377   | Hs.181028.2  | <b>-2,25</b> | 0,001161 |
| 224989_at   | Full-length cDNA clone CS0DE011YO20 of Placenta of Homo sapiens (human)                                                                             | AI824013  |        | Hs.122489.0  | <b>-2,26</b> | 0,009242 |
| 204779_s_at | HOXB7: homeobox B7                                                                                                                                  | NM_004502 | 3217   | g4758551     | <b>-2,31</b> | 0,007854 |
| 218186_at   | RAB25: RAB25, member RAS oncogene family                                                                                                            | NM_020387 | 57111  | g9966860     | <b>-2,31</b> | 0,005598 |
| 213333_at   | MDH2: malate dehydrogenase 2, NAD (mitochondrial)                                                                                                   | AL520774  | 4191   | Hs.111076.1  | <b>-2,33</b> | 0,00178  |
| 225371_at   | GLE1L: GLE1 RNA export mediator-like (yeast)                                                                                                        | AI638714  | 2733   | Hs.169363.1  | <b>-2,38</b> | 0,003202 |
| 1553954_at  | ALG14: asparagine-linked glycosylation 14 homolog ( <i>S. cerevisiae</i> )                                                                          | BU682208  | 199857 | Hs2.124005.1 | <b>-2,45</b> | 0,006578 |
| 202217_at   | C21orf33: chromosome 21 open reading frame 33                                                                                                       | NM_004649 | 8209   | g5031690     | <b>-2,47</b> | 0,00498  |
| 213169_at   | SEMA5A: sema domain, seven thrombospondin repeats (type 1 and type 1-like), transmembrane domain (TM) and short cytoplasmic domain, (semaphorin) 5A | BG109855  | 9037   | Hs.49476.0   | <b>-2,47</b> | 0,001627 |
| 221817_at   | DOLPP1: dolichyl pyrophosphate phosphatase 1                                                                                                        | AI684664  | 57171  | Hs.21701.0   | <b>-2,52</b> | 0,007867 |
| 209711_at   | SLC35D1: solute carrier family 35 (UDP-glucuronic acid/UDP-N-acetylgalactosamine dual transporter), member D1                                       | N80922    | 23169  | Hs.82635.0   | <b>-2,55</b> | 0,003596 |
| 219388_at   | GRHL2: grainyhead-like 2 ( <i>Drosophila</i> )                                                                                                      | NM_024915 | 79977  | g13376381    | <b>-2,65</b> | 0,005785 |
| 236548_at   | GIPC2: GIPC PDZ domain containing family, member 2                                                                                                  | AL044570  | 54810  | Hs.147975.0  | <b>-2,69</b> | 0,005518 |
| 201886_at   | WDR23: WD repeat domain 23                                                                                                                          | NM_025230 | 80344  | g13489107    | <b>-2,74</b> | 0,006444 |
| 219709_x_at | C16orf24: chromosome 16 open reading frame 24                                                                                                       | NM_023933 | 65990  | g13027599    | <b>-2,75</b> | 0,00832  |
| 222886_at   | Hs.18740.0                                                                                                                                          | AK025762  |        | Hs.18740.0   | <b>-2,75</b> | 0,006308 |
| 206698_at   | XK: X-linked Kx blood group (McLeod syndrome)                                                                                                       | NM_021083 | 7504   | g10835266    | <b>-2,76</b> | 0,003018 |
| 225286_at   | ARSD: arylsulfatase D                                                                                                                               | AI741110  | 414    | Hs.19978.5   | <b>-2,84</b> | 0,008708 |
| 226041_at   | NAPE-PLD: N-acyl-phosphatidylethanolamine-hydrolyzing phospholipase D                                                                               | BF382393  | 222236 | Hs.210706.0  | <b>-2,92</b> | 0,004125 |

Online Resource 1 - Comparison Control sample vs. DF samples

|              |                                                                        |           |        |             |              |          |
|--------------|------------------------------------------------------------------------|-----------|--------|-------------|--------------|----------|
| 1552257_a_at | TLL12: tubulin tyrosine ligase-like family, member 12                  | NM_015140 | 23170  | Hs.82563.1  | <b>-2,99</b> | 0,00784  |
| 218272_at    | FLJ20699: hypothetical protein FLJ20699                                | NM_017931 | 55020  | g8923627    | <b>-3,02</b> | 0,007276 |
| 225846_at    | RBM35A: RNA binding motif protein 35A                                  | BF001941  | 54845  | Hs.24743.1  | <b>-3,07</b> | 0,000518 |
| 223183_at    | AGPAT3: 1-acylglycerol-3-phosphate O-acyltransferase 3                 | AI928403  | 56894  | Hs.284123.0 | <b>-3,09</b> | 0,003678 |
| 228400_at    | SHROOM3: shroom family member 3                                        | AW025141  | 57619  | Hs.27196.0  | <b>-3,11</b> | 0,002418 |
| 205709_s_at  | CDS1: CDP-diacylglycerol synthase (phosphatidate cytidyltransferase) 1 | NM_001263 | 1040   | g4502756    | <b>-3,16</b> | 0,001627 |
| 225623_at    | KIAA1737: KIAA1737                                                     | AI621225  | 85457  | Hs.22452.0  | <b>-3,19</b> | 0,006238 |
| 225536_at    | TMEM54: transmembrane protein 54                                       | AL545105  | 113452 | Hs.109748.0 | <b>-3,24</b> | 0,009014 |
| 218916_at    | ZNF768: zinc finger protein 768                                        | NM_024671 | 79724  | g13375931   | <b>-3,25</b> | 0,006702 |
| 229852_at    | NMNAT1: nicotinamide nucleotide adenylyltransferase 1                  | AW779092  | 64802  | Hs.58251.0  | <b>-3,36</b> | 0,006675 |
| 209635_at    | AP1S1: adaptor-related protein complex 1, sigma 1 subunit              | BC003561  | 1174   | g13097710   | <b>-3,44</b> | 0,004161 |
| 226185_at    | CDNA: FLJ23044 fis, clone LNG02454                                     | AK026697  |        | Hs.52620.2  | <b>-3,46</b> | 0,000729 |
| 210608_s_at  | FUT2: fucosyltransferase 2 (secretor status included)                  | BC001899  | 2524   | g12804894   | <b>-3,58</b> | 0,002925 |
| 206149_at    | CHP2: calcineurin B homologous protein 2                               | NM_022097 | 63928  | g11545810   | <b>-3,89</b> | 0,006678 |
| 236219_at    | TMEM20: transmembrane protein 20                                       | AI452512  | 159371 | Hs.134069.0 | <b>-4,81</b> | 0,00259  |
| 222760_at    | ZNF703: zinc finger protein 703                                        | BG290193  | 80139  | Hs.288042.0 | <b>-6,03</b> | 0,004193 |
