# Supplementary material
Source: PubMed Central journal article supplement (PMC3575885)
Supplement: 12263_2012_301_MOESM2_ESM.pdf [file 12263_2012_301_MOESM2_ESM.pdf]

**Article title:** *Lactobacillus paracasei* and *Lactobacillus plantarum* Strains Downregulate Proinflammatory Genes in an *Ex Vivo* System of Cultured Human Colonic Mucosa

**Journal:** Genes & Nutrition

**Authors:** Christine Bäuerl<sup>a</sup>, Marta Llopis<sup>b</sup>, María Antolín<sup>b</sup>, Vicente Monedero<sup>a</sup>, Manuel Mata<sup>c</sup>, Manuel Zúñiga<sup>a</sup>, Francisco Guarner<sup>b</sup> and Gaspar Pérez Martínez<sup>a</sup>

**Affiliation:** <sup>a</sup> Department of Food Biotechnology, Instituto de Agroquímica y Tecnología de Alimentos, CSIC, Valencia, Spain

<sup>b</sup> Digestive System Research Unit, University Hospital Vall d'Hebron, Centro de Investigación Biomédica en Red de Enfermedades Hepáticas y Digestivas (Ciberehd), Barcelona, Spain

<sup>c</sup> Research Foundation, Hospital General Universitario, University of Valencia, Valencia, Spain

**E-Mail of the Corresponding Author:**

Gaspar Perez Martinez, e-mail: gaspar.perez@iata.csic.es

## Online Resource 2: Differentially expressed genes in Cluster 1 to Cluster 11

| CLUSTER 1   |                                                                             |           | inflamed vs Control | iLP vs Control | iLP (A-) vs Control | iBL23 vs Control | iLP vs inflamed | iLP (A-) vs inflamed | iBL23 vs inflamed |
|-------------|-----------------------------------------------------------------------------|-----------|---------------------|----------------|---------------------|------------------|-----------------|----------------------|-------------------|
| probe set   | gene                                                                        | Accession | fold-change         | fold-change    | fold-change         | fold-change      | fold-change     | fold-change          | fold-change       |
| 203518_at   | LYST: lysosomal trafficking regulator                                       | NM_000081 | 1,07                | -1,41          | -1,31               | -1,36            | -1,5            | -1,41                | -1,45             |
| 203882_at   | ISGF3G: interferon-stimulated transcription factor 3, gamma 48kDa           | NM_006084 | 1,15                | -1,46          | -1,32               | -1,53            | -1,68           | -1,51                | -1,76             |
| 204298_s_at | LOX: lysyl oxidase                                                          | NM_002317 | -1,01               | -1,5           | -1,89               | -1,69            | -1,49           | -1,88                | -1,68             |
| 204523_at   | ZNF140: zinc finger protein 140                                             | NM_003440 | 1,29                | -1,32          | -1,48               | -1,25            | -1,7            | -1,91                | -1,61             |
| 206118_at   | STAT4: signal transducer and activator of transcription 4                   | NM_003151 | -1,01               | -1,41          | -1,54               | -1,56            | -1,4            | -1,53                | -1,55             |
| 207651_at   | GPR171: G protein-coupled receptor 171                                      | NM_013308 | 2,12                | -1,01          | -1,61               | -1,08            | -2,13           | -3,4                 | -2,29             |
| 208933_s_at | LGALS8: lectin, galactoside-binding, soluble, 8 (galectin 8)                | A1659005  | 1,04                | -1,55          | -1,35               | -1,25            | -1,62           | -1,41                | -1,3              |
| 209012_at   | TRIO: triple functional domain (PTPRF interacting)                          | AV718192  | 1,09                | -1,5           | -1,32               | -1,51            | -1,63           | -1,43                | -1,64             |
| 209884_s_at | SLC4A7: solute carrier family 4, sodium bicarbonate cotransporter, member 7 | AF047033  | -1,11               | -1,92          | -2,02               | -1,65            | -1,73           | -1,81                | -1,48             |
| 209941_at   | RIPK1: receptor (TNFRSF)-interacting serine-threonine kinase 1              | U50062    | 1,28                | -1,29          | -1,19               | -1,3             | -1,66           | -1,53                | -1,67             |
| 212689_s_at | JMJD1A: jumonji domain containing 1A                                        | AA524505  | 1,06                | -1,43          | -1,35               | -1,55            | -1,52           | -1,44                | -1,64             |
| 213908_at   | WHDC1L1: WAS protein homology region 2 domain containing 1-like 1           | A1824078  | 1,11                | -1,23          | -1,77               | -1,26            | -1,37           | -1,97                | -1,4              |
| 221094_s_at | ELP3: elongation protein 3 homolog ( <i>S. cerevisiae</i> )                 | NM_018091 | 1,1                 | -1,36          | -1,03               | -1,32            | -1,5            | -1,14                | -1,46             |

Online Resource 2 - Differentially expressed genes Cluster 1 to Cluster 11

|                  |                                                                                                                                                |                  |                            |                       |                            |                         |                        |                             |                          |
|------------------|------------------------------------------------------------------------------------------------------------------------------------------------|------------------|----------------------------|-----------------------|----------------------------|-------------------------|------------------------|-----------------------------|--------------------------|
| 221559_s_at      | MIS12: MIS12, MIND kinetochore complex component, homolog (yeast)                                                                              | BC000229         | 1,41                       | -1,33                 | -1,26                      | -1,22                   | -1,88                  | -1,78                       | -1,73                    |
| 224260_at        | CDNA clone IMAGE:4478733                                                                                                                       | AF062385         | 1,38                       | -2,82                 | -1,27                      | -2,26                   | -3,89                  | -1,75                       | -3,12                    |
| 224872_at        | DIP2B: DIP2 disco-interacting protein 2 homolog B (Drosophila)                                                                                 | AB040896         | 1,27                       | -1,22                 | 1,03                       | -1,16                   | -1,55                  | -1,24                       | -1,48                    |
| 225024_at        | C20orf77: chromosome 20 open reading frame 77                                                                                                  | AL117521         | -1,02                      | -1,56                 | -1,19                      | -1,33                   | -1,53                  | -1,17                       | -1,31                    |
| 225296_at        | ZNF317: zinc finger protein 317                                                                                                                | AB046808         | 1,12                       | -1,52                 | -1,49                      | -1,44                   | -1,69                  | -1,66                       | -1,61                    |
| 226218_at        | IL7R: interleukin 7 receptor                                                                                                                   | BE217880         | 1,18                       | -1,26                 | -1,9                       | -1,2                    | -1,49                  | -2,24                       | -1,41                    |
| 226555_at        | FLJ20309: hypothetical protein FLJ20309                                                                                                        | BG026789         | 1,31                       | -1,28                 | -1,12                      | -1,21                   | -1,67                  | -1,46                       | -1,58                    |
| 227892_at        | PRKAA2: protein kinase, AMP-activated, alpha 2 catalytic subunit                                                                               | AA855042         | 1,38                       | -1,13                 | -1,14                      | -1,1                    | -1,56                  | -1,57                       | -1,51                    |
| 228230_at        | PRIC285: peroxisomal proliferator-activated receptor A interacting complex 285                                                                 | AL121829         | 1,45                       | -1,61                 | 1,04                       | -1,87                   | -2,33                  | -1,39                       | -2,7                     |
| 231876_at        | TRIM56: tripartite motif-containing 56                                                                                                         | AL512757         | 1,17                       | -1,45                 | -1,38                      | -1,41                   | -1,7                   | -1,62                       | -1,65                    |
| 234725_s_at      | SEMA4B: sema domain, immunoglobulin domain (Ig), transmembrane domain (TM) and short cytoplasmic domain, (semaphorin) 4B                       | AK026133         | 1,21                       | -1,5                  | -1,06                      | -1,52                   | -1,82                  | -1,28                       | -1,84                    |
| 235157_at        | Transcribed locus                                                                                                                              | AW297731         | 1,83                       | -1,46                 | -1,09                      | -1,31                   | -2,67                  | -2                          | -2,4                     |
| 236026_at        | GPATCH2: G patch domain containing 2                                                                                                           | AA160529         | 1,3                        | -1,15                 | 1,33                       | -1,49                   | -1,49                  | 1,03                        | -1,93                    |
| 236480_at        | CDNA FLJ41489 fis, clone BRTHA2004582                                                                                                          | AA543084         | 1,02                       | -1,78                 | -1,4                       | -2,33                   | -1,8                   | -1,42                       | -2,36                    |
| 238493_at        | ZNF506: zinc finger protein 506                                                                                                                | AI559570         | 1,16                       | -1,33                 | -1,36                      | -1,24                   | -1,55                  | -1,57                       | -1,43                    |
| 242052_at        | CDNA FLJ31445 fis, clone NT2NE2000864                                                                                                          | AW979272         | 1,58                       | 1,02                  | -1,17                      | 1,02                    | -1,56                  | -1,85                       | -1,55                    |
| 1562275_at       | MRNA; cDNA DKFZp667P1024 (from clone DKFZp667P1024)                                                                                            | AL832835         | 1,3                        | -2,71                 | -2,16                      | -2,31                   | -3,53                  | -2,81                       | -3                       |
|                  |                                                                                                                                                |                  |                            |                       |                            |                         |                        |                             |                          |
| <b>CLUSTER 2</b> |                                                                                                                                                |                  | <b>inflamed vs Control</b> | <b>iLP vs Control</b> | <b>iLP (A-) vs Control</b> | <b>iBL23 vs Control</b> | <b>iLP vs inflamed</b> | <b>iLP (A-) vs inflamed</b> | <b>iBL23 vs inflamed</b> |
| <b>probe set</b> | <b>gene</b>                                                                                                                                    | <b>Accession</b> | <b>fold-change</b>         | <b>fold-change</b>    | <b>fold-change</b>         | <b>fold-change</b>      | <b>fold-change</b>     | <b>fold-change</b>          | <b>fold-change</b>       |
| 213265_at        | PGA3 /// PGA4 /// PGA5: pepsinogen 5, group I (pepsinogen A) /// pepsinogen 3, group I (pepsinogen A) /// pepsinogen 4, group I (pepsinogen A) | AI570199         | -1,14                      | -1,46                 | -1,58                      | -1,05                   | -1,28                  | -1,38                       | 1,08                     |
| 227229_at        | CDNA clone IMAGE:5303499                                                                                                                       | BE467416         | -1,39                      | -1,55                 | -1,41                      | -1,03                   | -1,11                  | -1,01                       | 1,35                     |
|                  |                                                                                                                                                |                  |                            |                       |                            |                         |                        |                             |                          |
| <b>CLUSTER 3</b> |                                                                                                                                                |                  | <b>inflamed vs Control</b> | <b>iLP vs Control</b> | <b>iLP (A-) vs Control</b> | <b>iBL23 vs Control</b> | <b>iLP vs inflamed</b> | <b>iLP (A-) vs inflamed</b> | <b>iBL23 vs inflamed</b> |
| <b>probe set</b> | <b>gene</b>                                                                                                                                    | <b>Accession</b> | <b>fold-change</b>         | <b>fold-change</b>    | <b>fold-change</b>         | <b>fold-change</b>      | <b>fold-change</b>     | <b>fold-change</b>          | <b>fold-change</b>       |
| 214972_at        | MGEA5: Meningioma expressed antigen 5 (hyaluronidase)                                                                                          | AU144791         | -1,78                      | -1,6                  | -1,21                      | -1,92                   | 1,12                   | 1,48                        | -1,08                    |
| 244871_s_at      | USP32: ubiquitin specific peptidase 32                                                                                                         | AW268357         | -1,44                      | -1,29                 | -1,42                      | -1,55                   | 1,11                   | 1,01                        | -1,08                    |

Online Resource 2 - Differentially expressed genes Cluster 1 to Cluster 11

|                  |                                                                                                                                                                                |                  |                            |                       |                            |                         |                        |                             |                          |
|------------------|--------------------------------------------------------------------------------------------------------------------------------------------------------------------------------|------------------|----------------------------|-----------------------|----------------------------|-------------------------|------------------------|-----------------------------|--------------------------|
| 236930_at        | NUMB: Numb homolog (Drosophila)                                                                                                                                                | AW167424         | -1,66                      | -1,3                  | -1,15                      | -1,41                   | 1,28                   | 1,45                        | 1,18                     |
| 217620_s_at      | PIK3CB: phosphoinositide-3-kinase, catalytic, beta polypeptide                                                                                                                 | AA805318         | -1,62                      | -1,61                 | -1,34                      | -1,53                   | 1                      | 1,21                        | 1,06                     |
| 1555523_a_at     | FYCO1: FYVE and coiled-coil domain containing 1                                                                                                                                | BC007218         | -4,03                      | -5,18                 | -1,86                      | -3,83                   | -1,29                  | 2,16                        | 1,05                     |
| 226125_at        | CDNA clone IMAGE:4346813                                                                                                                                                       | BF346665         | -2,72                      | -2,48                 | -2,53                      | -2,29                   | 1,1                    | 1,07                        | 1,18                     |
| 232628_at        | CDNA FLJ13464 fis, clone PLACE1003478                                                                                                                                          | AI740629         | -1,9                       | -1,61                 | -1,39                      | -1,61                   | 1,18                   | 1,37                        | 1,18                     |
| 240081_at        | Hs.272139.0                                                                                                                                                                    | AA004803         | -2,12                      | -1,78                 | -1,6                       | -1,85                   | 1,19                   | 1,32                        | 1,15                     |
| 239990_at        | Transcribed locus                                                                                                                                                              | AI821426         | -2,02                      | -1,64                 | -1,39                      | -1,34                   | 1,23                   | 1,46                        | 1,51                     |
| 210224_at        | MR1: major histocompatibility complex, class I-related                                                                                                                         | AF031469         | -2,13                      | -2,03                 | -2,19                      | -1,38                   | 1,05                   | -1,03                       | 1,54                     |
| 208386_x_at      | DMC1: DMC1 dosage suppressor of mck1 homolog, meiosis-specific homologous recombination (yeast)                                                                                | NM_007068        | -1,91                      | -1,4                  | -1,98                      | -1,65                   | 1,36                   | -1,04                       | 1,16                     |
| 223975_at        | SPRYD5: SPRY domain containing 5                                                                                                                                               | BC005014         | -2,88                      | -2,63                 | -3,28                      | -2,24                   | 1,1                    | -1,14                       | 1,29                     |
| 205448_s_at      | MAP3K12: mitogen-activated protein kinase kinase kinase 12                                                                                                                     | NM_006301        | -1,43                      | -1,76                 | -1,23                      | -1,44                   | -1,24                  | 1,16                        | -1,01                    |
| 211884_s_at      | CIITA: class II, major histocompatibility complex, transactivator                                                                                                              | U31931           | -1,75                      | -1,94                 | -1,19                      | -1,67                   | -1,11                  | 1,47                        | 1,05                     |
| 204348_s_at      | AK3L1 /// AK3L2 /// LOC645619: adenylate kinase 3-like 1 /// adenylate kinase 3-like 2 /// similar to Adenylate kinase isoenzyme 4, mitochondrial (ATP-AMP transphosphorylase) | NM_013410        | -1,27                      | -1,65                 | -1,29                      | -1,81                   | -1,29                  | -1,01                       | -1,42                    |
| 1558430_at       | CDNA FLJ36648 fis, clone UTERU1000138                                                                                                                                          | R08650           | -1,4                       | -1,28                 | -1,12                      | -1,68                   | 1,09                   | 1,24                        | -1,2                     |
|                  |                                                                                                                                                                                |                  |                            |                       |                            |                         |                        |                             |                          |
|                  |                                                                                                                                                                                |                  |                            |                       |                            |                         |                        |                             |                          |
| <b>CLUSTER 4</b> |                                                                                                                                                                                |                  | <b>inflamed vs Control</b> | <b>iLP vs Control</b> | <b>iLP (A-) vs Control</b> | <b>iBL23 vs Control</b> | <b>iLP vs inflamed</b> | <b>iLP (A-) vs inflamed</b> | <b>iBL23 vs inflamed</b> |
| <b>probe set</b> | <b>gene</b>                                                                                                                                                                    | <b>Accession</b> | <b>fold-change</b>         | <b>fold-change</b>    | <b>fold-change</b>         | <b>fold-change</b>      | <b>fold-change</b>     | <b>fold-change</b>          | <b>fold-change</b>       |
| 202052_s_at      | RAI14: retinoic acid induced 14                                                                                                                                                | NM_015577        | -1,01                      | -1,62                 | -1,78                      | -1,6                    | -1,61                  | -1,77                       | -1,59                    |
| 202973_x_at      | FAM13A1: family with sequence similarity 13, member A1                                                                                                                         | NM_014883        | -1,52                      | -1,74                 | -1,48                      | -1,71                   | -1,14                  | 1,03                        | -1,13                    |
| 203282_at        | GBE1: glucan (1,4-alpha-), branching enzyme 1 (glycogen branching enzyme, Andersen disease, glycogen storage disease type IV)                                                  | NM_000158        | -1,37                      | -2,19                 | -1,99                      | -1,97                   | -1,59                  | -1,45                       | -1,44                    |
| 204422_s_at      | FGF2: fibroblast growth factor 2 (basic)                                                                                                                                       | NM_002006        | -2,54                      | -4,08                 | -4,11                      | -3,55                   | -1,61                  | -1,62                       | -1,4                     |
| 204614_at        | SERPINB2: serpin peptidase inhibitor, clade B (ovalbumin), member 2                                                                                                            | NM_002575        | -3,43                      | -5,14                 | -5,23                      | -4,99                   | -1,5                   | -1,53                       | -1,46                    |
| 204994_at        | MX2: myxovirus (influenza virus) resistance 2 (mouse)                                                                                                                          | NM_002463        | -1,55                      | -2                    | -1,85                      | -1,93                   | -1,29                  | -1,19                       | -1,24                    |
| 205258_at        | INHBB: inhibin, beta B                                                                                                                                                         | NM_002193        | -1,2                       | -2,53                 | -2,53                      | -1,84                   | -2,11                  | -2,11                       | -1,53                    |
| 206172_at        | IL13RA2: interleukin 13 receptor, alpha 2                                                                                                                                      | NM_000640        | -1,43                      | -3,57                 | -3,6                       | -5,29                   | -2,5                   | -2,53                       | -3,71                    |
| 206336_at        | CXCL6: chemokine (C-X-C motif) ligand 6 (granulocyte chemotactic protein 2)                                                                                                    | NM_002993        | -1,98                      | -3,53                 | -3,38                      | -2,56                   | -1,78                  | -1,71                       | -1,29                    |
| 206924_at        | IL11: interleukin 11                                                                                                                                                           | NM_000641        | -2,63                      | -3,75                 | -5,31                      | -5,03                   | -1,42                  | -2,02                       | -1,91                    |

Online Resource 2 - Differentially expressed genes Cluster 1 to Cluster 11

|              |                                                                                                           |           |       |       |       |       |       |       |       |
|--------------|-----------------------------------------------------------------------------------------------------------|-----------|-------|-------|-------|-------|-------|-------|-------|
| 207078_at    | MED6: mediator complex subunit 6                                                                          | NM_005466 | -1,27 | -1,24 | -2,13 | -1,51 | 1,02  | -1,69 | -1,2  |
| 211559_s_at  | CCNG2: cyclin G2                                                                                          | L49506    | -1,26 | -1,86 | -1,86 | -1,95 | -1,47 | -1,47 | -1,54 |
| 211743_s_at  | PRG2: proteoglycan 2, bone marrow (natural killer cell activator, eosinophil granule major basic protein) | BC005929  | -3,15 | -3,26 | -3,08 | -4,37 | -1,04 | 1,02  | -1,39 |
| 212942_s_at  | KIAA1199: KIAA1199                                                                                        | AB033025  | -1,66 | -3,83 | -6,08 | -3,77 | -2,31 | -3,67 | -2,28 |
| 214476_at    | TFF2: trefoil factor 2 (spasmolytic protein 1)                                                            | NM_005423 | -1,66 | -3,37 | -2,53 | -2,59 | -2,03 | -1,52 | -1,56 |
| 214974_x_at  | CXCL5: chemokine (C-X-C motif) ligand 5                                                                   | AK026546  | -2,67 | -9,88 | -6,07 | -7,85 | -3,7  | -2,27 | -2,94 |
| 215446_s_at  | LOX: lysyl oxidase                                                                                        | L16895    | -1,18 | -1,85 | -2,15 | -1,8  | -1,57 | -1,82 | -1,52 |
| 218898_at    | FAM57A: family with sequence similarity 57, member A                                                      | NM_024792 | -1,3  | -2,04 | -2,46 | -2,09 | -1,57 | -1,89 | -1,61 |
| 219163_at    | ZNF562: zinc finger protein 562                                                                           | NM_017656 | -1,07 | -1,51 | -1,42 | -1,51 | -1,41 | -1,33 | -1,42 |
| 219911_s_at  | SLCO4A1: solute carrier organic anion transporter family, member 4A1                                      | NM_016354 | -1,22 | -1,74 | -1,71 | -1,96 | -1,43 | -1,4  | -1,61 |
| 225750_at    | CDNA FLJ14162 fis, clone NT2RM4002504                                                                     | BE966748  | -1,02 | -1,61 | -1,48 | -1,63 | -1,57 | -1,45 | -1,59 |
| 226347_at    | Hs.268231.0                                                                                               | AI754928  | -1,18 | -2,04 | -1,84 | -1,86 | -1,73 | -1,56 | -1,57 |
| 226348_at    | Hs.268231.0                                                                                               | AK026764  | -1,16 | -1,71 | -1,49 | -1,5  | -1,48 | -1,29 | -1,3  |
| 226695_at    | PRRX1: paired related homeobox 1                                                                          | AA775472  | -1,31 | -3,76 | -1,96 | -2,28 | -2,86 | -1,5  | -1,73 |
| 226705_at    | FGFR1: fibroblast growth factor receptor 1 (fms-related tyrosine kinase 2, Pfeiffer syndrome)             | BE467261  | -1,33 | -1,56 | -1,43 | -1,45 | -1,17 | -1,07 | -1,09 |
| 227919_at    | UCA1: urothelial cancer associated 1                                                                      | AA702248  | -1,43 | -2,07 | -2,01 | -2,46 | -1,45 | -1,4  | -1,71 |
| 228082_at    | ASAM: adipocyte-specific adhesion molecule                                                                | BF056275  | -1,93 | -1,81 | -2,29 | -1,91 | 1,07  | -1,18 | 1,01  |
| 228748_at    | CD59: CD59 molecule, complement regulatory protein                                                        | AI653117  | -1,17 | -1,98 | -1,47 | -1,64 | -1,69 | -1,25 | -1,4  |
| 229414_at    | PITPNC1: phosphatidylinositol transfer protein, cytoplasmic 1                                             | AI676095  | 1,02  | -2,15 | -2,24 | -2,29 | -2,19 | -2,28 | -2,34 |
| 238649_at    | PITPNC1: phosphatidylinositol transfer protein, cytoplasmic 1                                             | AA815089  | -1,22 | -2,4  | -2,88 | -2,31 | -1,96 | -2,36 | -1,89 |
| 229795_at    | Transcribed locus                                                                                         | AI701591  | -1,59 | -2,65 | -3,21 | -2,66 | -1,67 | -2,02 | -1,68 |
| 230748_at    | SLC16A6: solute carrier family 16, member 6 (monocarboxylic acid transporter 7)                           | AI873273  | -1,11 | -1,91 | -2,18 | -2,02 | -1,71 | -1,96 | -1,82 |
| 231751_at    | ABCG8: ATP-binding cassette, sub-family G (WHITE), member 8 (sterolin 2)                                  | NM_022437 | -2,92 | -1,43 | -3,11 | -4,06 | 2,04  | -1,06 | -1,39 |
| 232113_at    | CDNA FLJ38472 fis, clone FEBRA2022148                                                                     | N90870    | -1,95 | -2,02 | -2,11 | -2,04 | -1,03 | -1,08 | -1,04 |
| 236474_at    | Transcribed locus                                                                                         | AI797677  | -1,29 | -1,73 | -1,8  | -1,84 | -1,34 | -1,4  | -1,43 |
| 236599_at    | Hs.38449.0                                                                                                | AA703280  | -1,58 | -3,25 | -2,73 | -2,66 | -2,06 | -1,74 | -1,69 |
| 240072_at    | ASXL2: Additional sex combs like 2 (Drosophila)                                                           | N75937    | -1,46 | -1,39 | -1,96 | -1,66 | 1,05  | -1,34 | -1,13 |
| 243020_at    | Transcribed locus                                                                                         | R06738    | -1,91 | -2,12 | -1,77 | -1,99 | -1,11 | 1,08  | -1,04 |
| 1555514_a_at | PIAS2: protein inhibitor of activated STAT, 2                                                             | AF361054  | -1,66 | -1,58 | -1,67 | -2,06 | 1,05  | -1    | -1,24 |
| 1555875_at   | Homo sapiens, clone IMAGE:3604678, mRNA                                                                   | BU733713  | -1,3  | -2,18 | -1,69 | -1,72 | -1,68 | -1,3  | -1,33 |

Online Resource 2 - Differentially expressed genes Cluster 1 to Cluster 11

|                  |                                                                                                      |                  |                            |                       |                            |                         |                        |                             |                          |
|------------------|------------------------------------------------------------------------------------------------------|------------------|----------------------------|-----------------------|----------------------------|-------------------------|------------------------|-----------------------------|--------------------------|
| 1556806_at       | Clone TEA5 Cri-du-chat critical region mRNA                                                          | BM684993         | -1,24                      | -1,51                 | -1,34                      | -1,51                   | -1,21                  | -1,08                       | -1,22                    |
| <b>CLUSTER 5</b> |                                                                                                      |                  | <b>inflamed vs Control</b> | <b>iLP vs Control</b> | <b>iLP (A-) vs Control</b> | <b>iBL23 vs Control</b> | <b>iLP vs inflamed</b> | <b>iLP (A-) vs inflamed</b> | <b>iBL23 vs inflamed</b> |
| <b>probe set</b> | <b>gene</b>                                                                                          | <b>Accession</b> | <b>fold-change</b>         | <b>fold-change</b>    | <b>fold-change</b>         | <b>fold-change</b>      | <b>fold-change</b>     | <b>fold-change</b>          | <b>fold-change</b>       |
| 217505_at        | KLHL23: kelch-like 23 (Drosophila)                                                                   | BG403790         | 2,27                       | 1,27                  | 1,5                        | 2,63                    | -1,79                  | -1,51                       | 1,16                     |
| 243792_x_at      | PTPN13: Protein tyrosine phosphatase, non-receptor type 13 (APO-1/CD95 (Fas)-associated phosphatase) | AI281371         | 2,07                       | 1,21                  | 1,42                       | 2,7                     | -1,72                  | -1,46                       | 1,3                      |
| 1564996_at       | CDNA FLJ20017 fis, clone ADSE00552                                                                   | AK000024         | 1,07                       | -1,02                 | -2,33                      | 7,77                    | -1,09                  | -2,49                       | 7,27                     |
| <b>CLUSTER 6</b> |                                                                                                      |                  | <b>inflamed vs Control</b> | <b>iLP vs Control</b> | <b>iLP (A-) vs Control</b> | <b>iBL23 vs Control</b> | <b>iLP vs inflamed</b> | <b>iLP (A-) vs inflamed</b> | <b>iBL23 vs inflamed</b> |
| <b>probe set</b> | <b>gene</b>                                                                                          | <b>Accession</b> | <b>fold-change</b>         | <b>fold-change</b>    | <b>fold-change</b>         | <b>fold-change</b>      | <b>fold-change</b>     | <b>fold-change</b>          | <b>fold-change</b>       |
| 202531_at        | IRF1: interferon regulatory factor 1                                                                 | NM_002198        | 2,43                       | 2,33                  | 2,62                       | 2,27                    | -1,04                  | 1,08                        | -1,07                    |
| 238725_at        | Hs.180559.0 (IRF1: interferon regulatory factor 1)                                                   | AW392551         | 3,15                       | 2,53                  | 2,94                       | 2,43                    | -1,25                  | -1,07                       | -1,3                     |
| 202748_at        | GBP2: guanylate binding protein 2, interferon-inducible                                              | NM_004120        | 1,71                       | 1,59                  | 1,61                       | 1,43                    | -1,08                  | -1,06                       | -1,2                     |
| 242907_at        | Hs.160628.0 (GBP2: guanylate binding protein 2, interferon-inducible)                                | BF509371         | 2,47                       | 2,15                  | 2,3                        | 2,22                    | -1,15                  | -1,07                       | -1,11                    |
| 203915_at        | CXCL9: chemokine (C-X-C motif) ligand 9                                                              | NM_002416        | 9,91                       | 3,02                  | 3,49                       | 2,37                    | -3,28                  | -2,84                       | -4,17                    |
| 204121_at        | GADD45G: growth arrest and DNA-damage-inducible, gamma                                               | NM_006705        | 1,81                       | 2,01                  | 2,06                       | 2,15                    | 1,11                   | 1,14                        | 1,19                     |
| 205249_at        | EGR2: early growth response 2 (Krox-20 homolog, Drosophila)                                          | NM_000399        | 2,56                       | 2,1                   | 2,3                        | 2,02                    | -1,22                  | -1,11                       | -1,27                    |
| 205890_s_at      | UBD: ubiquitin D                                                                                     | NM_006398        | 2,87                       | 2,19                  | 2,43                       | 1,87                    | -1,31                  | -1,18                       | -1,54                    |
| 206256_at        | CPN1: carboxypeptidase N, polypeptide 1                                                              | NM_001308        | 2                          | 1,53                  | 1,27                       | 1,71                    | -1,31                  | -1,57                       | -1,17                    |
| 206366_x_at      | XCL2: chemokine (C motif) ligand 2                                                                   | U23772           | 8,28                       | 4,48                  | 3,36                       | 4,23                    | -1,85                  | -2,47                       | -1,96                    |
| 214567_s_at      | XCL1 /// XCL2: chemokine (C motif) ligand 1 /// chemokine (C motif) ligand 2                         | NM_003175        | 7,02                       | 4,14                  | 3,12                       | 3,89                    | -1,7                   | -2,25                       | -1,8                     |
| 206914_at        | CRTAM: cytotoxic and regulatory T cell molecule                                                      | NM_019604        | 3,2                        | 2,3                   | 1,69                       | 2,13                    | -1,39                  | -1,89                       | -1,5                     |
| 207315_at        | CD226: CD226 molecule                                                                                | NM_006566        | 2,96                       | 1,36                  | 1,55                       | 1,46                    | -2,18                  | -1,91                       | -2,03                    |
| 207536_s_at      | TNFRSF9: tumor necrosis factor receptor superfamily, member 9                                        | NM_001561        | 3,9                        | 2,49                  | 2,44                       | 1,9                     | -1,56                  | -1,59                       | -2,05                    |
| 211786_at        | TNFRSF9: tumor necrosis factor receptor superfamily, member 9                                        | BC006196         | 4,99                       | 1,2                   | 2,15                       | 1,28                    | -4,15                  | -2,31                       | -3,9                     |
| 207849_at        | IL2: interleukin 2                                                                                   | NM_000586        | 9,52                       | 2,18                  | 2,24                       | 2,84                    | -4,38                  | -4,25                       | -3,36                    |
| 207986_x_at      | CYB561: cytochrome b-561                                                                             | NM_001915        | 1,92                       | 1,27                  | 1,88                       | 1,44                    | -1,51                  | -1,02                       | -1,33                    |
| 210029_at        | INDO: indoleamine-pyrrole 2,3 dioxygenase                                                            | M34455           | 4,46                       | 1,79                  | 1,34                       | 1,55                    | -2,49                  | -3,34                       | -2,88                    |
| 210056_at        | RND1: Rho family GTPase 1                                                                            | U69563           | 1,77                       | 1,42                  | 1,4                        | 1,44                    | -1,24                  | -1,26                       | -1,23                    |

Online Resource 2 - Differentially expressed genes Cluster 1 to Cluster 11

|              |                                                                                              |           |       |       |       |       |       |       |       |
|--------------|----------------------------------------------------------------------------------------------|-----------|-------|-------|-------|-------|-------|-------|-------|
| 210163_at    | CXCL11: chemokine (C-X-C motif) ligand 11                                                    | AF030514  | 8,74  | 3,81  | 5,86  | 3,11  | -2,29 | -1,49 | -2,81 |
| 211122_s_at  | CXCL11: chemokine (C-X-C motif) ligand 11                                                    | AF002985  | 12,95 | 4,6   | 7,15  | 3,01  | -2,81 | -1,81 | -4,31 |
| 210164_at    | GZMB: granzyme B (granzyme 2, cytotoxic T-lymphocyte-associated serine esterase 1)           | J03189    | 6,5   | 2,32  | 3,18  | 2,61  | -2,8  | -2,05 | -2,49 |
| 210354_at    | IFNG: interferon, gamma                                                                      | M29383    | 10,51 | 5,93  | 4,81  | 4,41  | -1,77 | -2,18 | -2,38 |
| 211269_s_at  | IL2RA: interleukin 2 receptor, alpha                                                         | K03122    | 2,66  | 2,07  | 1,69  | 2,02  | -1,29 | -1,58 | -1,32 |
| 211597_s_at  | HOP: homeodomain-only protein                                                                | AB059408  | 1,71  | 1,1   | -1,09 | 1,4   | -1,55 | -1,87 | -1,23 |
| 212005_at    | C1orf144: chromosome 1 open reading frame 144                                                | AL582808  | 4,93  | 1,45  | 1,37  | -1,07 | -3,4  | -3,6  | -5,28 |
| 214228_x_at  | TNFRSF4: tumor necrosis factor receptor superfamily, member 4                                | AJ277151  | 2,69  | 1,78  | 1,52  | 1,59  | -1,51 | -1,76 | -1,69 |
| 214447_at    | ETS1: v-ets erythroblastosis virus E26 oncogene homolog 1 (avian)                            | NM_005238 | 2,65  | 1,62  | -1,12 | 1,59  | -1,63 | -2,98 | -1,67 |
| 216876_s_at  | IL17A: interleukin 17A                                                                       | Z58820    | 14,3  | 6,86  | 5,61  | 5,88  | -2,08 | -2,55 | -2,43 |
| 218723_s_at  | C13orf15: chromosome 13 open reading frame 15                                                | NM_014059 | 1,68  | 1,56  | 1,53  | 1,64  | -1,08 | -1,09 | -1,02 |
| 219359_at    | ATHL1: ATH1, acid trehalase-like 1 (yeast)                                                   | NM_025092 | 1,89  | 1,4   | 1,36  | 1,33  | -1,36 | -1,39 | -1,42 |
| 219597_s_at  | DUOX1: dual oxidase 1                                                                        | NM_017434 | 2,09  | 1,33  | 1,4   | 1,75  | -1,57 | -1,5  | -1,2  |
| 219836_at    | ZBED2: zinc finger, BED-type containing 2                                                    | NM_024508 | 3,68  | 2,39  | 1,65  | 1,9   | -1,54 | -2,24 | -1,94 |
| 36019_at     | STK19: serine/threonine kinase 19                                                            | L26260    | 2,13  | 1,29  | 1,15  | 1,43  | -1,65 | -1,85 | -1,49 |
| 36564_at     | RNF19B: ring finger protein 19B                                                              | W27419    | 4,19  | 1,28  | 2,18  | 1,61  | -3,28 | -1,92 | -2,6  |
| 40687_at     | GJA4: gap junction protein, alpha 4, 37kDa                                                   | M96789    | 2,29  | 1,96  | 2,67  | 2,09  | -1,17 | 1,17  | -1,1  |
| 222694_at    | MGC2752: hypothetical protein MGC2752                                                        | AI015612  | 2,26  | 1,67  | 1,32  | 1,75  | -1,36 | -1,71 | -1,29 |
| 223913_s_at  | C19orf30: chromosome 19 open reading frame 30                                                | AB058892  | 2,18  | -2,05 | -1,33 | 2,12  | -4,47 | -2,9  | -1,03 |
| 225945_at    | ZNF655: zinc finger protein 655                                                              | BF219240  | 1,58  | -1,07 | -1,02 | -1,01 | -1,7  | -1,62 | -1,6  |
| 230453_s_at  | ATP2A3: ATPase, Ca++ transporting, ubiquitous                                                | AW188009  | 2,74  | -2,84 | 2,33  | 1,43  | -7,79 | -1,18 | -1,91 |
| 231578_at    | GBP1: guanylate binding protein 1, interferon-inducible, 67kDa                               | AW014593  | 3,47  | 1,97  | 1,58  | 2,03  | -1,76 | -2,19 | -1,71 |
| 232593_at    | LINCR: likely ortholog of mouse lung-inducible Neutralized-related C3HC4 RING domain protein | AL389981  | 2,32  | 1,39  | 1,54  | 1,1   | -1,67 | -1,5  | -2,12 |
| 235042_at    | XIRP1: xin actin-binding repeat containing 1                                                 | AW755250  | 4,4   | 2,76  | 2,66  | 2,2   | -1,59 | -1,65 | -2    |
| 235175_at    | GBP4: guanylate binding protein 4                                                            | BG260886  | 2,9   | 1,58  | 1,57  | 1,3   | -1,83 | -1,85 | -2,22 |
| 237104_at    | CTSS: cathepsin S                                                                            | BE675415  | 1,95  | 1,3   | 1,26  | 1,12  | -1,5  | -1,55 | -1,74 |
| 237487_at    | Transcribed locus                                                                            | N69685    | 3,94  | 1,08  | 3,8   | 1,86  | -3,64 | -1,03 | -2,11 |
| 238950_at    | Transcribed locus                                                                            | BF056988  | 4,35  | 2,21  | 2,64  | 2,85  | -1,97 | -1,65 | -1,53 |
| 239931_at    | MYC: v-myc myelocytomatosis viral oncogene homolog (avian)                                   | BF512882  | 2,87  | 1,77  | 1,26  | 2,23  | -1,62 | -2,28 | -1,29 |
| 244029_at    | CDNA FLJ42228 fis, clone THYMU2041252                                                        | AW967768  | 1,91  | -1,05 | -1,01 | 1,36  | -2,01 | -1,92 | -1,4  |
| 244044_at    | ENPP3: Ectonucleotide pyrophosphatase/phosphodiesterase 3                                    | AV691872  | 3,02  | 1,42  | 1,89  | 1,57  | -2,12 | -1,6  | -1,92 |
| 1566303_s_at | PPP1R11: protein phosphatase 1, regulatory (inhibitor) subunit 11                            | AV755778  | 1,83  | -1,01 | 1,24  | 1,14  | -1,84 | -1,47 | -1,6  |

Online Resource 2 - Differentially expressed genes Cluster 1 to Cluster 11

| CLUSTER 7    |                                                                                                         |           |                                    |                               |                                    |                                 |                                |                                     |                                  |
|--------------|---------------------------------------------------------------------------------------------------------|-----------|------------------------------------|-------------------------------|------------------------------------|---------------------------------|--------------------------------|-------------------------------------|----------------------------------|
| probe set    | gene                                                                                                    | Accession | inflamed vs Control<br>fold-change | iLP vs Control<br>fold-change | iLP (A-) vs Control<br>fold-change | iBL23 vs Control<br>fold-change | iLP vs inflamed<br>fold-change | iLP (A-) vs inflamed<br>fold-change | iBL23 vs inflamed<br>fold-change |
| 210225_x_at  | LILRB3: leukocyte immunoglobulin-like receptor, subfamily B (with TM and ITIM domains), member 3        | AF009635  | -1,79                              | 1,05                          | -1,33                              | -2,67                           | 1,89                           | 1,35                                | -1,49                            |
| 225238_at    | MSI2: musashi homolog 2 (Drosophila)                                                                    | BF435123  | -2,37                              | 1,14                          | -1,1                               | -3,04                           | 2,69                           | 2,15                                | -1,29                            |
| CLUSTER 8    |                                                                                                         |           |                                    |                               |                                    |                                 |                                |                                     |                                  |
| probe set    | gene                                                                                                    | Accession | inflamed vs Control<br>fold-change | iLP vs Control<br>fold-change | iLP (A-) vs Control<br>fold-change | iBL23 vs Control<br>fold-change | iLP vs inflamed<br>fold-change | iLP (A-) vs inflamed<br>fold-change | iBL23 vs inflamed<br>fold-change |
| 206823_at    | L3MBTL: l(3)mbt-like (Drosophila)                                                                       | NM_015478 | -1,26                              | 2,06                          | 1,2                                | -1,07                           | 2,6                            | 1,51                                | 1,17                             |
| 207823_s_at  | AIF1: allograft inflammatory factor 1                                                                   | NM_004847 | 1,04                               | 3,01                          | -1,09                              | 1,03                            | 2,9                            | -1,14                               | -1,01                            |
| 215151_at    | DOCK10: dedicator of cytokinesis 10                                                                     | AB014594  | 1,26                               | 1,44                          | -1,24                              | 1,29                            | 1,14                           | -1,56                               | 1,03                             |
| 216328_at    | SIGLEC8: sialic acid binding Ig-like lectin 8                                                           | AF287892  | -2,15                              | 3,91                          | 1,26                               | 1,51                            | 8,43                           | 2,72                                | 3,26                             |
| 216948_at    | Hs.247878.0                                                                                             | AL049545  | 1,2                                | 9,26                          | 3,42                               | -1,42                           | 7,72                           | 2,85                                | -1,7                             |
| 219521_at    | B3GAT1: beta-1,3-glucuronyltransferase 1 (glucuronosyltransferase P)                                    | NM_018644 | 4,43                               | 23,26                         | 2,64                               | 1,18                            | 5,26                           | -1,68                               | -3,74                            |
| 220698_at    | MGC4294: hypothetical protein MGC4294                                                                   | NM_024314 | -1,04                              | 1,63                          | -1,2                               | 1,06                            | 1,7                            | -1,15                               | 1,1                              |
| 220824_at    | CCDC37: coiled-coil domain containing 37                                                                | NM_017674 | -1,07                              | 1,6                           | -1,65                              | 1,23                            | 1,72                           | -1,54                               | 1,32                             |
| 229079_at    | EHMT2: Euchromatic histone-lysine N-methyltransferase 2                                                 | AI828004  | -1,91                              | 1,87                          | 1,06                               | 1,11                            | 3,57                           | 2,02                                | 2,13                             |
| 233081_at    | receptor accessory protein 5, CDNA FLJ12305 fis, clone MAMMA1001890,                                    | AV712346  | 1,39                               | 1,69                          | 1,12                               | -1,09                           | 1,21                           | -1,25                               | -1,52                            |
| 234858_at    | LOC646693: similar to Calponin-2 (Calponin H2, smooth muscle) (Neutral calponin)                        | AL008639  | 1,53                               | 4,29                          | 1,25                               | 1,22                            | 2,8                            | -1,23                               | -1,25                            |
| 234881_at    | Hs.248020.0                                                                                             | L33988    | 1,24                               | 2,02                          | 1,69                               | -1,09                           | 1,63                           | 1,36                                | -1,35                            |
| 236005_at    | KLF12: Kruppel-like factor 12                                                                           | AI807987  | -1,79                              | 2,03                          | -1,32                              | 1,12                            | 3,63                           | 1,35                                | 1,99                             |
| 237448_at    | Transcribed locus                                                                                       | AI216576  | -2,31                              | 1,55                          | -1,78                              | -1,33                           | 3,57                           | 1,3                                 | 1,73                             |
| 237878_at    | MAP2K2: mitogen-activated protein kinase kinase 2 pseudogene; mitogen-activated protein kinase kinase 2 | H69555    | -1,22                              | 1,81                          | 1,74                               | -1,08                           | 2,21                           | 2,12                                | 1,13                             |
| 238837_at    | PHF8: PHD finger protein 8                                                                              | BE676640  | 5,62                               | 20,76                         | 3,23                               | 1,15                            | 3,69                           | -1,74                               | -4,88                            |
| 243955_at    | Transcribed locus                                                                                       | AI934364  | -1,71                              | 1,92                          | -1,05                              | -1,29                           | 3,28                           | 1,63                                | 1,33                             |
| 1554492_at   | THADA: thyroid adenoma associated                                                                       | BC037990  | 1,55                               | 41,67                         | 2,02                               | 1,91                            | 26,96                          | 1,31                                | 1,23                             |
| 1555605_x_at | BAGE: B melanoma antigen                                                                                | AF527551  | -1,5                               | 2,93                          | -1,34                              | -2,49                           | 4,39                           | 1,12                                | -1,67                            |
| 1558648_at   | CCDC32: coiled-coil domain containing 32                                                                | AL832032  | 1,73                               | 2,74                          | 1,5                                | 1,04                            | 1,58                           | -1,16                               | -1,66                            |

Online Resource 2 - Differentially expressed genes Cluster 1 to Cluster 11

|                   |                                                                                                                                                                  |                  |                            |                       |                            |                         |                        |                             |                          |
|-------------------|------------------------------------------------------------------------------------------------------------------------------------------------------------------|------------------|----------------------------|-----------------------|----------------------------|-------------------------|------------------------|-----------------------------|--------------------------|
| 1569338_at        | PAPLN: papilin, proteoglycan-like sulfated glycoprotein                                                                                                          | BC044305         | 1,2                        | 1,14                  | -1,72                      | -1,04                   | -1,05                  | -2,06                       | -1,25                    |
|                   |                                                                                                                                                                  |                  |                            |                       |                            |                         |                        |                             |                          |
| <b>CLUSTER 9</b>  |                                                                                                                                                                  |                  | <b>inflamed vs Control</b> | <b>iLP vs Control</b> | <b>iLP (A-) vs Control</b> | <b>iBL23 vs Control</b> | <b>iLP vs inflamed</b> | <b>iLP (A-) vs inflamed</b> | <b>iBL23 vs inflamed</b> |
| <b>probe set</b>  | <b>gene</b>                                                                                                                                                      | <b>Accession</b> | <b>fold-change</b>         | <b>fold-change</b>    | <b>fold-change</b>         | <b>fold-change</b>      | <b>fold-change</b>     | <b>fold-change</b>          | <b>fold-change</b>       |
| 202911_at         | MSH6: mutS homolog 6 (E. coli)                                                                                                                                   | NM_000179        | 1,24                       | 1,7                   | 1,79                       | 1,71                    | 1,37                   | 1,44                        | 1,37                     |
| 209808_x_at       | ING1: inhibitor of growth family, member 1                                                                                                                       | AW193656         | 1,32                       | 1,41                  | 1,66                       | 1,67                    | 1,06                   | 1,25                        | 1,26                     |
| 210933_s_at       | FSCN1: fascin homolog 1, actin-bundling protein (Strongylocentrotus purpuratus)                                                                                  | BC004908         | 1,15                       | 1,68                  | 1,66                       | 1,85                    | 1,46                   | 1,44                        | 1,6                      |
| 213931_at         | ID2 /// ID2B: inhibitor of DNA binding 2, dominant negative helix-loop-helix protein /// inhibitor of DNA binding 2B, dominant negative helix-loop-helix protein | A1819238         | 1,09                       | 1,45                  | 1,43                       | 1,77                    | 1,32                   | 1,31                        | 1,62                     |
| 218032_at         | SNN: stannin                                                                                                                                                     | AF070673         | 1,35                       | 1,91                  | 1,75                       | 1,84                    | 1,41                   | 1,29                        | 1,36                     |
| 219566_at         | PLEKHF1: pleckstrin homology domain containing, family F (with FYVE domain) member 1                                                                             | NM_024310        | 1,44                       | 2,78                  | 3                          | 2,71                    | 1,93                   | 2,08                        | 1,88                     |
| 223129_x_at       | MYLIP: myosin regulatory light chain interacting protein                                                                                                         | T63512           | 1,17                       | 1,54                  | 1,6                        | 1,6                     | 1,32                   | 1,37                        | 1,37                     |
| 223130_s_at       | MYLIP: myosin regulatory light chain interacting protein                                                                                                         | AF212221         | 1,09                       | 1,49                  | 1,52                       | 1,5                     | 1,37                   | 1,4                         | 1,38                     |
| 228098_s_at       | MYLIP: myosin regulatory light chain interacting protein                                                                                                         | AW292746         | 1,14                       | 1,39                  | 1,46                       | 1,56                    | 1,23                   | 1,28                        | 1,37                     |
| 225005_at         | PHF13: PHD finger protein 13                                                                                                                                     | AL039384         | 1,04                       | 1,75                  | 1,72                       | 1,72                    | 1,68                   | 1,65                        | 1,64                     |
| 225977_at         | PCDH18: protocadherin 18                                                                                                                                         | BF062943         | 1,93                       | 3,53                  | 2,41                       | 2,22                    | 1,82                   | 1,25                        | 1,15                     |
| 226552_at         | IER5L: immediate early response 5-like                                                                                                                           | BF110608         | 1,19                       | 1,41                  | 1,62                       | 1,84                    | 1,19                   | 1,37                        | 1,55                     |
| 230477_at         | MUC16: mucin 16, cell surface associated                                                                                                                         | A1588962         | 1,29                       | 1,77                  | 2                          | 2,02                    | 1,37                   | 1,54                        | 1,56                     |
| 230508_at         | DKK3: dickkopf homolog 3 (Xenopus laevis)                                                                                                                        | AL569601         | 1,12                       | 1,54                  | 1,15                       | 1,59                    | 1,37                   | 1,03                        | 1,42                     |
| 1561619_at        | LINGO-1: leucine rich repeat and Ig domain containing 1                                                                                                          | BI463387         | 2,16                       | 2,84                  | 1,74                       | 2,51                    | 1,31                   | -1,24                       | 1,16                     |
| 1569376_s_at      | CDNA clone IMAGE:4297546                                                                                                                                         | BC029435         | -1,2                       | 3,04                  | 2,69                       | 1,72                    | 3,66                   | 3,23                        | 2,07                     |
|                   |                                                                                                                                                                  |                  |                            |                       |                            |                         |                        |                             |                          |
| <b>CLUSTER 10</b> |                                                                                                                                                                  |                  | <b>inflamed vs Control</b> | <b>iLP vs Control</b> | <b>iLP (A-) vs Control</b> | <b>iBL23 vs Control</b> | <b>iLP vs inflamed</b> | <b>iLP (A-) vs inflamed</b> | <b>iBL23 vs inflamed</b> |
| <b>probe set</b>  | <b>gene</b>                                                                                                                                                      | <b>Accession</b> | <b>fold-change</b>         | <b>fold-change</b>    | <b>fold-change</b>         | <b>fold-change</b>      | <b>fold-change</b>     | <b>fold-change</b>          | <b>fold-change</b>       |
| 212142_at         | MCM4: minichromosome maintenance complex component 4                                                                                                             | A1936566         | -1,66                      | 1,12                  | 1,81                       | 1,23                    | 1,86                   | 3                           | 2,05                     |
| 212964_at         | HIC2: hypermethylated in cancer 2                                                                                                                                | A1912206         | 1,21                       | 1,52                  | 2,46                       | 1,58                    | 1,26                   | 2,03                        | 1,3                      |
| 212981_s_at       | FAM115A: family with sequence similarity 115, member A                                                                                                           | BF030508         | 1,11                       | 1,38                  | 1,65                       | 1,41                    | 1,24                   | 1,49                        | 1,27                     |
| 214245_at         | RPS14: ribosomal protein S14                                                                                                                                     | A1734124         | 1,43                       | -1,4                  | 1,91                       | 1,37                    | -2,01                  | 1,33                        | -1,05                    |
| 214651_s_at       | HOXA9: homeobox A9                                                                                                                                               | U41813           | -1,3                       | 1,08                  | 1,49                       | 1,29                    | 1,41                   | 1,93                        | 1,68                     |



Online Resource 2 - Differentially expressed genes Cluster 1 to Cluster 11

|                   |                                                                                             |                  |                            |                       |                            |                         |                        |                             |                          |
|-------------------|---------------------------------------------------------------------------------------------|------------------|----------------------------|-----------------------|----------------------------|-------------------------|------------------------|-----------------------------|--------------------------|
| 220987_s_at       | C11orf17 /// NUA2: chromosome 11 open reading frame 17 /// NUA2 family, SNF1-like kinase, 2 | NM_030952        | 1,24                       | 1,29                  | 1,64                       | 1,4                     | 1,04                   | 1,32                        | 1,12                     |
| 34697_at          | LRP6: low density lipoprotein receptor-related protein 6                                    | AF074264         | -1,57                      | -1,19                 | 1,86                       | 1,35                    | 1,32                   | 2,92                        | 2,12                     |
| 224958_at         | NUFIP2: nuclear fragile X mental retardation protein interacting protein 2                  | AV728521         | -1,13                      | 1,18                  | 1,36                       | 1,21                    | 1,33                   | 1,53                        | 1,37                     |
| 229043_at         | PAPD5: PAP associated domain containing 5                                                   | AI492902         | 1,09                       | 1,49                  | 1,81                       | 1,62                    | 1,36                   | 1,66                        | 1,48                     |
| 229051_at         | YPEL2: yippee-like 2 (Drosophila)                                                           | AW005748         | 1,17                       | 1,77                  | 2,84                       | 1,09                    | 1,52                   | 2,44                        | -1,07                    |
| 235823_at         | ACSF3: acyl-CoA synthetase family member 3                                                  | AI763000         | 1,18                       | 1,38                  | 1,87                       | 1,52                    | 1,17                   | 1,58                        | 1,28                     |
| 237019_at         | Transcribed locus                                                                           | AI479285         | 1,44                       | -1,37                 | 2,13                       | 1,58                    | -1,97                  | 1,48                        | 1,09                     |
| 239115_at         | MRNA full length insert cDNA clone EUROIMAGE 687685                                         | AA670271         | 4,52                       | 2,02                  | 7,4                        | 1,58                    | -2,24                  | 1,64                        | -2,86                    |
| 240744_at         | CPA5: carboxypeptidase A5                                                                   | AW184014         | 3,72                       | 3,99                  | 6,76                       | 1,99                    | 1,07                   | 1,81                        | -1,87                    |
| 242118_x_at       | QRSL1:glutamyl-tRNA synthase (glutamine-hydrolyzing)-like 1                                 | N80145           | 1,94                       | 2,02                  | 4,61                       | 1,63                    | 1,04                   | 2,37                        | -1,19                    |
| 1553875_s_at      | ZSCAN10: zinc finger and SCAN domain containing 10                                          | NM_032805        | -1,26                      | -2,34                 | 3,99                       | 2,01                    | -1,85                  | 5,04                        | 2,54                     |
| 1555529_at        | RNH1: ribonuclease/angiogenin inhibitor 1                                                   | AY071904         | 1,24                       | 1,26                  | 1,6                        | 1,28                    | 1,02                   | 1,29                        | 1,03                     |
| 1556851_at        | CDNA FLJ33171 fis, clone ADRGL2000644                                                       | BE222476         | 1,35                       | 2,9                   | 8,11                       | 1,69                    | 2,14                   | 5,98                        | 1,24                     |
| 1557257_at        | BCL10: B-cell CLL/lymphoma 10                                                               | AA994334         | 1,42                       | 1,81                  | 2,64                       | 2,03                    | 1,27                   | 1,86                        | 1,43                     |
| 1561041_at        | TNRC6C: trinucleotide repeat containing 6C                                                  | BM459591         | -1,11                      | -1,56                 | 2,62                       | 1,52                    | -1,4                   | 2,91                        | 1,69                     |
| 1569905_at        | HSD11B1L: hydroxysteroid (11-beta) dehydrogenase 1-like                                     | BC018336         | -1,51                      | 1,14                  | 2,6                        | 1,25                    | 1,73                   | 3,92                        | 1,89                     |
|                   |                                                                                             |                  |                            |                       |                            |                         |                        |                             |                          |
| <b>CLUSTER 11</b> |                                                                                             |                  | <b>inflamed vs Control</b> | <b>iLP vs Control</b> | <b>iLP (A-) vs Control</b> | <b>iBL23 vs Control</b> | <b>iLP vs inflamed</b> | <b>iLP (A-) vs inflamed</b> | <b>iBL23 vs inflamed</b> |
| <b>probe set</b>  | <b>gene</b>                                                                                 | <b>Accession</b> | <b>fold-change</b>         | <b>fold-change</b>    | <b>fold-change</b>         | <b>fold-change</b>      | <b>fold-change</b>     | <b>fold-change</b>          | <b>fold-change</b>       |
| 204323_x_at       | NF1: neurofibromin 1 (neurofibromatosis, von Recklinghausen disease, Watson disease)        | M61213           | -1,59                      | 1,09                  | -1,1                       | 1,19                    | 1,73                   | 1,44                        | 1,88                     |
| 221088_s_at       | PPP1R9A: protein phosphatase 1, regulatory (inhibitor) subunit 9A                           | NM_017650        | -1,52                      | -1,23                 | 1,03                       | -1,1                    | 1,24                   | 1,57                        | 1,38                     |
| 223072_s_at       | WBP1: WW domain binding protein 1                                                           | U79457           | -1,56                      | -1,1                  | 1,03                       | 1,26                    | 1,41                   | 1,6                         | 1,96                     |
| 223074_s_at       | C9orf58: chromosome 9 open reading frame 58                                                 | AA205873         | -1,37                      | -1,38                 | 1,05                       | 2,44                    | -1,01                  | 1,43                        | 3,34                     |
| 235953_at         | ZNF610: zinc finger protein 610                                                             | AA776810         | -1,45                      | -1,33                 | 1,29                       | 1,03                    | 1,09                   | 1,86                        | 1,48                     |
