# Supplementary material
Source: PubMed Central journal article supplement (PMC3575885)
Supplement: 12263_2012_301_MOESM3_ESM.pdf [file 12263_2012_301_MOESM3_ESM.pdf]

**Article title:**

*Lactobacillus paracasei* and *Lactobacillus plantarum* Strains Downregulate Proinflammatory Genes in an *Ex Vivo* System of Cultured Human Colonic Mucosa

**Journal:**

Genes & Nutrition

**Authors:**

Christine Bäuerl<sup>a</sup>, Marta Llopis<sup>b</sup>, María Antolín<sup>b</sup>, Vicente Monedero<sup>a</sup>, Manuel Mata<sup>c</sup>, Manuel Zúñiga<sup>a</sup>, Francisco Guarner<sup>b</sup> and Gaspar Pérez Martínez<sup>a</sup>

**Affiliation:**

<sup>a</sup> Department of Food Biotechnology, Instituto de Agroquímica y Tecnología de Alimentos, CSIC, Valencia, Spain

<sup>b</sup> Digestive System Research Unit, University Hospital Vall d’Hebron, Centro de Investigación Biomédica en Red de Enfermedades Hepáticas y Digestivas (Ciberehd), Barcelona, Spain

<sup>c</sup> Research Foundation, Hospital General Universitario, University of Valencia, Valencia, Spain

**E-Mail of the Corresponding Author:**

Gaspar Perez Martinez, e-mail: [gaspar.perez@iata.csic.es](mailto:gaspar.perez@iata.csic.es)

**Online resource 3: qPCR validation of microarray results – data of individual patients**

**Table a:** Fold-changes corresponding to explants of **patient 1 (RSL-6)** are represented relative to the Control sample and normalized to B2M gene expression.

| Gene    | Fold-change Arrays |      |         |       | Fold-change qPCR |      |         |       |
|---------|--------------------|------|---------|-------|------------------|------|---------|-------|
|         | Inflamed           | iLP  | iLP(A-) | iBL23 | Inflamed         | iLP  | iLP(A-) | iBL23 |
| IL2     | 10.1               | 2.2  | 2.3     | 3.1   | 15.2             | 4.2  | 3.9     | 4.2   |
| IL2RA   | 2.8                | 2.5  | 2.1     | 2.5   | 3.7              | 2.9  | 2.3     | 2.6   |
| IFNG    | 13.0               | 8.3  | 5.2     | 4.6   | 8.9              | 5.1  | 5.0     | 3.2   |
| IL17A   | 33.7               | 22.3 | 12.4    | 12.6  | 29.0             | 10.9 | 10.5    | 7.3   |
| GBP1    | 4.0                | 3.2  | 2.0     | 3.0   | 1.6              | 1.5  | 2.7     | 1.5   |
| CXCL11  | 26.6               | 20   | 25.3    | 11.5  | 40.7             | 37.4 | 98.7    | 14.4  |
| CXCL9   | 19.9               | 7.3  | 8.6     | 4.0   | 17.1             | 9.9  | 24.3    | 8.7   |
| GZMB    | 4.2                | 2.0  | 2.8     | -1.2  | 12.9             | 5.9  | 10.9    | 3.1   |
| TNFRSF9 | 4.3                | 3.1  | 1.8     | 2.2   | 3.4              | 2.9  | 2.7     | 2.5   |
| UBD     | 3.4                | 3.3  | 3.3     | 2.4   | 7.5              | 6.5  | 9.7     | 3.0   |

**Table b:** Fold-changes corresponding to explants of **patient 2 (RSL-21)** are represented relative to the Control sample and normalized to B2M gene expression.

| Gene    | Fold-change Arrays |      |         |       | Fold-change qPCR |      |         |       |
|---------|--------------------|------|---------|-------|------------------|------|---------|-------|
|         | Inflamed           | iLP  | iLP(A-) | iBL23 | Inflamed         | iLP  | iLP(A-) | iBL23 |
| IL2     | 6.3                | 1.7  | 2.0     | 2.0   | 10.5             | 3.9  | 2.9     | 3.5   |
| IL2RA   | 1.8                | 1.5  | 1.4     | 1.2   | 1.6              | 1.3  | 1.2     | -1.1  |
| IFNG    | 6.2                | 3.8  | 3.7     | 3.1   | 6.7              | 3.9  | 3.5     | 3.2   |
| IL17A   | 19.0               | 9.2  | 8.2     | 7.8   | 15.1             | 7.2  | 4.8     | 4.8   |
| GBP1    | 2.7                | 2.2  | 1.5     | 1.3   | 1.6              | -1.2 | 1.5     | 1.0   |
| CXCL11  | 5.2                | -1.5 | 1.4     | -1.9  | 11.6             | -1.3 | 1.7     | -1.7  |
| CXCL9   | 3.4                | -1.7 | 1.2     | -1.5  | 3.4              | -1.1 | 2.0     | -1.1  |
| GZMB    | 9.3                | 3.6  | 4.6     | 3.5   | 10.3             | 3.7  | 5.0     | 6.3   |
| TNFRSF9 | 3.3                | 2.3  | 2.7     | 1.4   | 3.3              | 1.1  | 2.1     | 2.2   |
| UBD     | 2.7                | 1.3  | 1.6     | 1.2   | 5.5              | 1.3  | 1.3     | 1.0   |

**Table c:** Fold-changes corresponding to explants of **patient 3 (RSL-10)** are represented relative to the Control sample and normalized to B2M gene expression.

| Gene    | Fold-change Arrays |      |         |       | Fold-change qPCR |      |         |       |
|---------|--------------------|------|---------|-------|------------------|------|---------|-------|
|         | Inflamed           | iLP  | iLP(A-) | iBL23 | Inflamed         | iLP  | iLP(A-) | iBL23 |
| IL2     | 12.5               | 3.7  | 3.3     | 3.0   | 67.3             | 27.1 | 26.1    | 19.5  |
| IL2RA   | 2.9                | 1.8  | 1.3     | 1.8   | 1.6              | 1.1  | 1.2     | 1.7   |
| IFNG    | 27.8               | 8.3  | 10.4    | 12.4  | 15.9             | 6.2  | 7.5     | 9.9   |
| IL17A   | 6.3                | 2.4  | 1.6     | 2.7   | 3.9              | 3.1  | 3.0     | 3.1   |
| GBP1    | 4.9                | 1.3  | 1.8     | 3.3   | 2.2              | 1.4  | 2.0     | 1.6   |
| CXCL11  | 131.5              | 33.3 | 79.6    | 46    | 89.6             | 46.5 | 105.9   | 36.8  |
| CXCL9   | 41.6               | 13.1 | 13.7    | 10.6  | 21.4             | 9.1  | 7.9     | 11.0  |
| GZMB    | 6.9                | 1.8  | 2.5     | 3.7   | 9.0              | 3.0  | 3.0     | 3.9   |
| TNFRSF9 | 4.4                | 2.0  | 3.3     | 2.3   | 4.1              | 2.5  | 3.7     | 2.9   |
| UBD     | 2.6                | 2.0  | 2.4     | 2.0   | 5.2              | 3.9  | 4.7     | 4.4   |
