# Supplementary material
Source: PubMed Central journal article supplement (PMC3575885)
Supplement: 12263_2012_301_MOESM4_ESM.pdf [file 12263_2012_301_MOESM4_ESM.pdf]

**Article title:**

*Lactobacillus paracasei* and *Lactobacillus plantarum* Strains Downregulate Proinflammatory Genes in an *Ex Vivo* System of Cultured Human Colonic Mucosa

**Journal:**

Genes & Nutrition

**Authors:**

Christine Bäuerl<sup>a</sup>, Marta Llopis<sup>b</sup>, María Antolín<sup>b</sup>, Vicente Monedero<sup>a</sup>, Manuel Mata<sup>c</sup>, Manuel Zúñiga<sup>a</sup>, Francisco Guarner<sup>b</sup> and Gaspar Pérez Martínez<sup>a</sup>

**Affiliation:**

<sup>a</sup> Department of Food Biotechnology, Instituto de Agroquímica y Tecnología de Alimentos, CSIC, Valencia, Spain

<sup>b</sup> Digestive System Research Unit, University Hospital Vall d'Hebron, Centro de Investigación Biomédica en Red de Enfermedades Hepáticas y Digestivas (Ciberehd), Barcelona, Spain

<sup>c</sup> Research Foundation, Hospital General Universitario, University of Valencia, Valencia, Spain

**E-Mail of the Corresponding Author:**

Gaspar Perez Martinez, e-mail: [gaspar.perez@iata.csic.es](mailto:gaspar.perez@iata.csic.es)

**Online Resource 4: qPCR data of additional individuals**

Gene expression ratios of each gene and additional individual are represented relative to PMA/IO stimulated explants (expression ratio 1.0) and normalized to B2M expression.

| Gene    | relative gene expression ratio (relative to PMA/IO stimulated sample) |         |      |                   |       |      |                   |       |      |
|---------|-----------------------------------------------------------------------|---------|------|-------------------|-------|------|-------------------|-------|------|
|         | patient 4 (RSL-1)                                                     |         |      | patient 5 (RSL-2) |       |      | patient 6 (RSL-7) |       |      |
|         | iLP                                                                   | iLP(A-) | BL23 | LP                | LP A- | BL23 | LP                | LP A- | BL23 |
| IL2     | 0.96                                                                  | 1.27    | 0.63 | 0.26              | 1.19  | 0.63 | 0.07              | 0.10  | 0.13 |
| IFNG    | 1.46                                                                  | 1.31    | 0.67 | 0.56              | 1.65  | 0.86 | 0.20              | 0.24  | 0.23 |
| CXCL9   | 0.34                                                                  | 0.60    | 0.44 | 0.41              | 0.43  | 0.53 | 0.52              | 0.37  | 0.47 |
| CXCL11  | 0.98                                                                  | 0.98    | 0.61 | 0.18              | 0.44  | 0.62 | 0.65              | 0.32  | 0.29 |
| IL17A   | 1.84                                                                  | 0.88    | 1.21 | 0.27              | 0.60  | 0.76 | 0.23              | 0.23  | 0.28 |
| UBD     | 0.70                                                                  | 1.08    | 0.63 | 0.47              | 0.45  | 0.66 | 0.80              | 0.62  | 0.42 |
| IL2RA   | 0.67                                                                  | 0.64    | 0.63 | 0.61              | 0.61  | 0.92 | 0.92              | 1.04  | 0.69 |
| GBP1    | 0.67                                                                  | 0.81    | 0.86 | 0.69              | 0.78  | 0.94 | 0.90              | 0.73  | 0.72 |
| GZMB    | 1.12                                                                  | 0.80    | 0.79 | 0.67              | 0.83  | 0.68 | 0.51              | 0.48  | 0.58 |
| TNFRSF9 | 1.24                                                                  | 0.87    | 1.02 | 1.06              | 1.10  | 1.05 | 0.70              | 0.74  | 0.77 |
