# Supplementary material
Source: PubMed Central journal article supplement (PMC3575885)
Supplement: 12263_2012_301_MOESM6_ESM.pdf [file 12263_2012_301_MOESM6_ESM.pdf]

**Article title:**

*Lactobacillus paracasei* and *Lactobacillus plantarum* Strains Downregulate Proinflammatory Genes in an *Ex Vivo* System of Cultured Human Colonic Mucosa

**Journal:**

Genes & Nutrition

**Authors:**

Christine Bäuerl<sup>a</sup>, Marta Llopis<sup>b</sup>, María Antolín<sup>b</sup>, Vicente Monedero<sup>a</sup>, Manuel Mata<sup>c</sup>, Manuel Zúñiga<sup>a</sup>, Francisco Guarner<sup>b</sup> and Gaspar Pérez Martínez<sup>a</sup>

**Affiliation:**

<sup>a</sup> Department of Food Biotechnology, Instituto de Agroquímica y Tecnología de Alimentos, CSIC, Valencia, Spain

<sup>b</sup> Digestive System Research Unit, University Hospital Vall d’Hebron, Centro de Investigación Biomédica en Red de Enfermedades Hepáticas y Digestivas (Ciberehd), Barcelona, Spain

<sup>c</sup> Research Foundation, Hospital General Universitario, University of Valencia, Valencia, Spain

**E-Mail of the corresponding Author Address:**

Gaspar Perez Martinez, e-mail: [gaspar.perez@iata.csic.es](mailto:gaspar.perez@iata.csic.es)

**Online Resource 6: Functional annotations analysis – group comparison**

The following tables are complementary data to Table 3 and are enumerating all significant annotation terms (FDR<0.05).

**Table a:** Significant annotations terms (FDR<0.05) corresponding to up- and downregulated genes in the PMA/IO stimulated group (Inflamed) compared to the Control group.

| Category                         | Annotation term                                | Significance (FDR) | Molecules |
|----------------------------------|------------------------------------------------|--------------------|-----------|
| <b><u>upregulated genes:</u></b> |                                                |                    |           |
| <b>BP:</b>                       | immune response                                | 2.49E-07           | 15        |
|                                  | immune system process                          | 3.58E-06           | 16        |
|                                  | positive regulation of immune system process   | 1.59E-03           | 7         |
|                                  | regulation of lymphocyte proliferation         | 2.16E-03           | 5         |
|                                  | regulation of leukocyte proliferation          | 2.26E-03           | 5         |
|                                  | regulation of mononuclear cell proliferation   | 2.26E-03           | 5         |
|                                  | regulation of leukocyte activation             | 2.77E-03           | 6         |
|                                  | regulation of immune system process            | 3.09E-03           | 8         |
|                                  | regulation of cell activation                  | 3.54E-03           | 6         |
|                                  | regulation of immune effector process          | 4.60E-03           | 5         |
|                                  | positive regulation of protein secretion       | 4.64E-03           | 4         |
|                                  | positive regulation of leukocyte activation    | 5.53E-03           | 5         |
|                                  | positive regulation of cell activation         | 6.58E-03           | 5         |
|                                  | regulation of homeostatic process              | 7.28E-03           | 5         |
|                                  | regulation of multicellular organismal process | 9.34E-03           | 11        |
|                                  | regulation of response to stimulus             | 9.63E-03           | 8         |
|                                  | regulation of activated T cell proliferation   | 1.00E-02           | 3         |
|                                  | regulation of lymphocyte apoptosis             | 1.00E-02           | 3         |
|                                  | regulation of lymphocyte mediated immunity     | 1.05E-02           | 4         |

Online Resource 6 - Functional annotations analysis – group comparison

|                                    |                                                       |          |    |
|------------------------------------|-------------------------------------------------------|----------|----|
|                                    | regulation of adaptive immune response based on       | 1.10E-02 | 4  |
|                                    | positive regulation of lymphocyte proliferation       | 1.10E-02 | 4  |
|                                    | regulation of immune response                         | 1.14E-02 | 6  |
|                                    | positive regulation of leukocyte proliferation        | 1.16E-02 | 4  |
|                                    | regulation of adaptive immune response                | 1.16E-02 | 4  |
|                                    | positive regulation of mononuclear cell proliferation | 1.16E-02 | 4  |
|                                    | regulation of protein secretion                       | 1.29E-02 | 4  |
|                                    | negative regulation of cell proliferation             | 1.47E-02 | 7  |
|                                    | regulation of leukocyte mediated immunity             | 1.49E-02 | 4  |
|                                    | regulation of T cell proliferation                    | 1.56E-02 | 4  |
|                                    | regulation of defense response                        | 1.70E-02 | 5  |
|                                    | response to stimulus                                  | 1.82E-02 | 22 |
|                                    | regulation of lymphocyte activation                   | 1.92E-02 | 5  |
|                                    | positive regulation of protein transport              | 1.95E-02 | 4  |
|                                    | regulation of interleukin-12 production               | 2.04E-02 | 3  |
|                                    | regulation of response to stress                      | 2.67E-02 | 6  |
|                                    | regulation of cytokine production                     | 3.98E-02 | 5  |
|                                    | regulation of immunoglobulin mediated immune          | 4.04E-02 | 3  |
|                                    | positive regulation of cell killing                   | 4.04E-02 | 3  |
|                                    | regulation of B cell mediated immunity                | 4.04E-02 | 3  |
|                                    | regulation of immunoglobulin production               | 4.72E-02 | 3  |
|                                    | regulation of cell proliferation                      | 4.74E-02 | 9  |
| <b>MF:</b>                         | Cytokine activity                                     | 4.5E-03  | 6  |
| <b>KEGG:</b>                       | Cytokine-cytokine receptor interaction                | 1.1E-05  | 9  |
| <b><u>downregulated genes:</u></b> |                                                       |          |    |
| <b>BP:</b>                         | response to wounding                                  | 7.68E-03 | 7  |
|                                    | wound healing                                         | 7.82E-03 | 5  |
|                                    | regulation of localization                            | 1.60E-02 | 7  |
|                                    | regulation of transport                               | 2.24E-02 | 6  |
|                                    | response to external stimulus                         | 2.50E-02 | 8  |
| <b>MF:</b>                         | Heparin binding                                       | 1.3E-02  | 4  |
|                                    | Glycosaminoglycan binding                             | 3.2E-02  | 4  |
|                                    | Pattern binding                                       | 4.2E-02  | 4  |
|                                    | Polysaccharide binding                                | 4.2E-02  | 4  |

The analysis is based on the default parameters in D.A.V.I.D. and uses FDR correction for multiple testing. BP: biological process; CC: cellular component; MF: molecular function; KEGG: KEGG pathway.

**Table b:** Significant annotations terms (FDR<0.05) corresponding to up- and downregulated genes in the iLP group compared to the PMA/IO stimulated (Inflamed) group.

| Category                           | Annotation term                                                                                                                         | Significance (FDR) | Molecules |
|------------------------------------|-----------------------------------------------------------------------------------------------------------------------------------------|--------------------|-----------|
| <b><u>upregulated genes:</u></b>   |                                                                                                                                         |                    |           |
| <b>BP, CC, MF, KEGG:</b>           | None significant                                                                                                                        |                    |           |
| <b><u>downregulated genes:</u></b> |                                                                                                                                         |                    |           |
| <b>BP:</b>                         | immune response                                                                                                                         | 3.64E-04           | 13        |
|                                    | taxis                                                                                                                                   | 8.45E-04           | 7         |
|                                    | chemotaxis                                                                                                                              | 8.45E-04           | 7         |
|                                    | response to external stimulus                                                                                                           | 1.28E-03           | 14        |
|                                    | immune system process                                                                                                                   | 3.10E-03           | 14        |
|                                    | response to chemical stimulus                                                                                                           | 1.03E-02           | 15        |
|                                    | locomotory behavior                                                                                                                     | 1.53E-02           | 7         |
|                                    | regulation of lymphocyte apoptosis                                                                                                      | 1.75E-02           | 3         |
|                                    | regulation of cell proliferation                                                                                                        | 2.26E-02           | 11        |
|                                    | response to wounding                                                                                                                    | 2.43E-02           | 9         |
|                                    | regulation of adaptive immune response based on somatic recombination of immune receptors built from immunoglobulin superfamily domains | 2.46E-02           | 4         |
|                                    | regulation of adaptive immune response                                                                                                  | 2.59E-02           | 4         |
|                                    | locomotion                                                                                                                              | 3.21E-02           | 8         |
| <b>CC:</b>                         | Extracellular space                                                                                                                     | 1.7E-04            | 13        |
|                                    | Extracellular region part                                                                                                               | 1.1E-03            | 14        |
| <b>MF:</b>                         | cytokine activity                                                                                                                       | 2.28E-05           | 9         |
|                                    | chemokine activity                                                                                                                      | 5.70E-04           | 5         |
|                                    | chemokine receptor binding                                                                                                              | 7.33E-04           | 5         |
|                                    | G-protein-coupled receptor binding                                                                                                      | 1.45E-03           | 6         |
|                                    | receptor binding                                                                                                                        | 4.38E-03           | 13        |
| <b>KEGG:</b>                       | Cytokine-cytokine receptor interaction                                                                                                  | 2.7E-06            | 11        |

The analysis is based on the default parameters in D.A.V.I.D. and uses FDR correction for multiple testing. BP: biological process; CC: cellular component; MF: molecular function; KEGG: KEGG pathway.

**Table c:** Significant annotations terms (FDR<0.05) corresponding to up- and downregulated genes in iLP(A) group compared to the PMA/IO stimulated (Inflamed) group.

| Category                           | Annotation term                                                                                                                         | Significance (FDR) | Molecules |
|------------------------------------|-----------------------------------------------------------------------------------------------------------------------------------------|--------------------|-----------|
| <b><u>upregulated genes:</u></b>   |                                                                                                                                         |                    |           |
| BP, CC, MF, KEGG:                  | None significant                                                                                                                        |                    |           |
| <b><u>downregulated genes:</u></b> |                                                                                                                                         |                    |           |
| BP:                                | immune response                                                                                                                         | 2.82E-08           | 17        |
|                                    | immune system process                                                                                                                   | 7.85E-07           | 18        |
|                                    | response to external stimulus                                                                                                           | 9.67E-06           | 16        |
|                                    | response to wounding                                                                                                                    | 3.09E-04           | 11        |
|                                    | response to stimulus                                                                                                                    | 3.69E-04           | 28        |
|                                    | positive regulation of immune system process                                                                                            | 3.93E-04           | 8         |
|                                    | chemotaxis                                                                                                                              | 4.04E-04           | 7         |
|                                    | taxis                                                                                                                                   | 4.04E-04           | 7         |
|                                    | regulation of leukocyte activation                                                                                                      | 4.97E-04           | 7         |
|                                    | regulation of immune effector process                                                                                                   | 5.34E-04           | 6         |
|                                    | regulation of cell activation                                                                                                           | 6.68E-04           | 7         |
|                                    | positive regulation of leukocyte activation                                                                                             | 6.74E-04           | 6         |
|                                    | regulation of response to stimulus                                                                                                      | 6.97E-04           | 10        |
|                                    | regulation of lymphocyte mediated immunity                                                                                              | 7.14E-04           | 5         |
|                                    | regulation of adaptive immune response based on somatic recombination of immune receptors built from immunoglobulin superfamily domains | 7.68E-04           | 5         |
|                                    | regulation of adaptive immune response                                                                                                  | 8.25E-04           | 5         |
|                                    | positive regulation of cell activation                                                                                                  | 8.40E-04           | 6         |
|                                    | regulation of leukocyte mediated immunity                                                                                               | 1.16E-03           | 5         |
|                                    | regulation of immune system process                                                                                                     | 1.18E-03           | 9         |
|                                    | regulation of secretion                                                                                                                 | 1.48E-03           | 7         |
|                                    | regulation of cell proliferation                                                                                                        | 1.76E-03           | 12        |
|                                    | regulation of cell killing                                                                                                              | 2.29E-03           | 4         |
|                                    | regulation of programmed cell death                                                                                                     | 2.32E-03           | 12        |
|                                    | regulation of cell death                                                                                                                | 2.39E-03           | 12        |
|                                    | regulation of immune response                                                                                                           | 2.74E-03           | 7         |
|                                    | regulation of lymphocyte activation                                                                                                     | 3.27E-03           | 6         |
|                                    | positive regulation of biological process                                                                                               | 3.32E-03           | 19        |
|                                    | positive regulation of cellular process                                                                                                 | 3.35E-03           | 18        |
|                                    | regulation of lymphocyte proliferation                                                                                                  | 3.83E-03           | 5         |
|                                    | regulation of leukocyte proliferation                                                                                                   | 4.01E-03           | 5         |
|                                    | regulation of mononuclear cell proliferation                                                                                            | 4.01E-03           | 5         |
|                                    | regulation of cellular localization                                                                                                     | 4.52E-03           | 7         |
|                                    | negative regulation of cell proliferation                                                                                               | 5.29E-03           | 8         |
|                                    | positive regulation of lymphocyte activation                                                                                            | 6.94E-03           | 5         |
|                                    | positive regulation of protein secretion                                                                                                | 7.17E-03           | 4         |
|                                    | regulation of response to stress                                                                                                        | 7.68E-03           | 7         |
|                                    | locomotory behavior                                                                                                                     | 7.68E-03           | 7         |
|                                    | regulation of apoptosis                                                                                                                 | 9.53E-03           | 11        |

Online Resource 6 - Functional annotations analysis – group comparison

|       |                                                                      |          |    |
|-------|----------------------------------------------------------------------|----------|----|
|       | positive regulation of secretion                                     | 1.08E-02 | 5  |
|       | positive regulation of cell proliferation                            | 1.19E-02 | 8  |
|       | regulation of homeostatic process                                    | 1.27E-02 | 5  |
|       | regulation of lymphocyte apoptosis                                   | 1.35E-02 | 3  |
|       | regulation of activated T cell proliferation                         | 1.35E-02 | 3  |
|       | regulation of T cell activation                                      | 1.40E-02 | 5  |
|       | locomotion                                                           | 1.51E-02 | 8  |
|       | positive regulation of lymphocyte proliferation                      | 1.69E-02 | 4  |
|       | positive regulation of mononuclear cell proliferation                | 1.79E-02 | 4  |
|       | positive regulation of leukocyte proliferation                       | 1.79E-02 | 4  |
|       | inflammatory response                                                | 1.86E-02 | 7  |
|       | regulation of protein secretion                                      | 1.98E-02 | 4  |
|       | regulation of transcription, DNA-dependent                           | 2.15E-02 | 16 |
|       | cell-cell signaling                                                  | 2.29E-02 | 9  |
|       | positive regulation of cell differentiation                          | 2.35E-02 | 6  |
|       | regulation of T cell proliferation                                   | 2.39E-02 | 4  |
|       | behavior                                                             | 2.45E-02 | 8  |
|       | regulation of localization                                           | 2.54E-02 | 9  |
|       | defense response                                                     | 2.67E-02 | 9  |
|       | regulation of RNA metabolic process                                  | 2.69E-02 | 16 |
|       | positive regulation of transcription, DNA-dependent                  | 2.69E-02 | 8  |
|       | positive regulation of RNA metabolic process                         | 2.82E-02 | 8  |
|       | regulation of defense response                                       | 2.92E-02 | 5  |
|       | positive regulation of protein transport                             | 2.98E-02 | 4  |
|       | regulation of multicellular organismal process                       | 3.03E-02 | 11 |
|       | response to chemical stimulus                                        | 3.10E-02 | 13 |
|       | positive regulation of transcription from RNA polymerase II promoter | 3.61E-02 | 7  |
|       | response to stress                                                   | 3.83E-02 | 15 |
|       | positive regulation of T cell activation                             | 4.25E-02 | 4  |
| CC:   | Extracellular space                                                  | 1.3E-6   | 15 |
|       | Extracellular region part                                            | 2.1E-6   | 17 |
|       | Extracellular region                                                 | 1.6E-2   | 21 |
| MF:   | cytokine activity                                                    | 7.39E-07 | 10 |
|       | receptor binding                                                     | 3.58E-04 | 14 |
|       | chemokine activity                                                   | 3.80E-04 | 5  |
|       | chemokine receptor binding                                           | 4.89E-04 | 5  |
|       | G-protein-coupled receptor binding                                   | 8.94E-04 | 6  |
| KEGG: | Cytokine-cytokine receptor interaction                               | 7.3E-10  | 14 |
|       | Jak-STAT signaling pathway                                           | 5.8E-06  | 9  |

The analysis is based on the default parameters in D.A.V.I.D. and uses FDR correction for multiple testing. BP: biological process; CC: cellular component; MF: molecular function; KEGG: KEGG pathway.

**Table d:** Significant annotations terms (FDR<0.05) corresponding to up- and downregulated genes in the iBL23 group compared to the PMA/IO stimulated (Inflamed) group.

| Category                           | Annotation term                                                                                                                         | Significance (FDR) | Molecules |
|------------------------------------|-----------------------------------------------------------------------------------------------------------------------------------------|--------------------|-----------|
| <b><u>upregulated genes:</u></b>   |                                                                                                                                         |                    |           |
| <b>BP, CC, MF, KEGG:</b>           | None significant                                                                                                                        |                    |           |
| <b><u>downregulated genes:</u></b> |                                                                                                                                         |                    |           |
| <b>BP:</b>                         | immune response                                                                                                                         | 5.78E-05           | 13        |
|                                    | immune system process                                                                                                                   | 4.82E-04           | 14        |
|                                    | regulation of adaptive immune response based on somatic recombination of immune receptors built from immunoglobulin superfamily domains | 1.49E-02           | 4         |
|                                    | regulation of adaptive immune response                                                                                                  | 1.57E-02           | 4         |
|                                    | response to external stimulus                                                                                                           | 1.83E-02           | 11        |
|                                    | regulation of cell proliferation                                                                                                        | 2.44E-02           | 10        |
|                                    | taxis                                                                                                                                   | 3.74E-02           | 5         |
|                                    | chemotaxis                                                                                                                              | 3.74E-02           | 5         |
|                                    | regulation of leukocyte activation                                                                                                      | 4.27E-02           | 5         |
|                                    | regulation of lymphocyte proliferation                                                                                                  | 4.80E-02           | 4         |
|                                    | regulation of immunoglobulin mediated immune response                                                                                   | 4.92E-02           | 3         |
|                                    | regulation of B cell mediated immunity                                                                                                  | 4.92E-02           | 3         |
|                                    | regulation of leukocyte proliferation                                                                                                   | 4.96E-02           | 4         |
|                                    | regulation of mononuclear cell proliferation                                                                                            | 4.96E-02           | 4         |
| <b>CC:</b>                         | Extracellular space                                                                                                                     | 1.3E-03            | 11        |
|                                    | Extracellular region part                                                                                                               | 4.8E-03            | 12        |
|                                    | Extracellular region                                                                                                                    | 1.2E-02            | 17        |
| <b>MF:</b>                         | cytokine activity                                                                                                                       | 6.00E-06           | 9         |
|                                    | receptor binding                                                                                                                        | 3.64E-03           | 12        |
|                                    | chemokine activity                                                                                                                      | 7.76E-03           | 4         |
|                                    | G-protein-coupled receptor binding                                                                                                      | 8.80E-03           | 5         |
|                                    | chemokine receptor binding                                                                                                              | 9.34E-03           | 4         |
| <b>KEGG</b>                        | Cytokine-cytokine receptor interaction                                                                                                  | 1.6E-06            | 11        |
|                                    | Jak-STAT signaling pathway                                                                                                              | 7.2E-03            | 6         |

The analysis is based on the default parameters in D.A.V.I.D. and uses FDR correction for multiple testing. BP: biological process; CC: cellular component; MF: molecular function; KEGG: KEGG pathway.
