# Supplementary material
Source: PubMed Central journal article supplement (PMC3575885)
Supplement: 12263_2012_301_MOESM7_ESM.pdf [file 12263_2012_301_MOESM7_ESM.pdf]

**Article title:**

*Lactobacillus paracasei* and *Lactobacillus plantarum* Strains Downregulate Proinflammatory Genes in an *Ex Vivo* System of Cultured Human Colonic Mucosa

**Journal:**

Genes & Nutrition

**Authors:**

Christine Bäuerl<sup>a</sup>, Marta Llopis<sup>b</sup>, María Antolín<sup>b</sup>, Vicente Monedero<sup>a</sup>, Manuel Mata<sup>c</sup>, Manuel Zúñiga<sup>a</sup>, Francisco Guarner<sup>b</sup> and Gaspar Pérez Martínez<sup>a</sup>

**Affiliation:**

<sup>a</sup> Department of Food Biotechnology, Instituto de Agroquímica y Tecnología de Alimentos, CSIC, Valencia, Spain

<sup>b</sup> Digestive System Research Unit, University Hospital Vall d'Hebron, Centro de Investigación Biomédica en Red de Enfermedades Hepáticas y Digestivas (Ciberehd), Barcelona, Spain

<sup>c</sup> Research Foundation, Hospital General Universitario, University of Valencia, Valencia, Spain

**E-Mail of the corresponding Author Address:**

Gaspar Perez Martinez, e-mail: [gaspar.perez@iata.csic.es](mailto:gaspar.perez@iata.csic.es)

## Online Resource 7: Summary of most significant networks

**Table a:** Significant networks (Score ≥ 15) derived from the up - and downregulated genes in Inflamed compared to Control sample.

| Net-work | Molecules in network                                                                                                                                                                                                                                                                                                                                                                                                                                                         | Score | Focus molecules | Top functions                                                                                                |
|----------|------------------------------------------------------------------------------------------------------------------------------------------------------------------------------------------------------------------------------------------------------------------------------------------------------------------------------------------------------------------------------------------------------------------------------------------------------------------------------|-------|-----------------|--------------------------------------------------------------------------------------------------------------|
| 1        | Ap1, <b>ATP2A3</b> , CCR3, CHEMOKINE; <b>CIITA</b> , Creb, <b>CXCL5</b> , <b>CXCL6</b> , <b>CXCL9</b> , <b>CXCL11</b> , CXCR3, <b>EHMT2</b> , <b>ETS1</b> , <b>GABBR1</b> , <b>GBP2</b> , <b>GZMB</b> , Histone h3, Histone h4, <b>IFNG</b> , <b>IL2</b> , <b>IL17A</b> , IL17F, <b>IL2RA</b> , <b>IRF1</b> , <b>MCM4</b> , <b>NF1</b> , Nfat (family), NFκB (complex), <b>PIAS2</b> , REL/RELA/RELB, RNA polymerase II, <b>SERPINB2</b> , STAT5a/b, <b>TNFRSF4</b> , TNFSF4 | 39    | 21              | Cell-to-Cell Signaling and Interaction, Inflammatory Response, Hematological System Development and Function |
| 2        | CXCL10, <b>CYB561</b> , DGKA, <b>FGF2</b> , FGFR1, <b>GBP1</b> , <b>GBP4</b> , heparin, <b>IDO1</b> , IFIT3, IFNAR2, <b>IL2</b> , <b>IL11</b> , IL15, <b>IL2RA</b> , IRF7, <b>IRF9</b> , LCK, MAGEA11, MIR31, <b>MX2</b> , <b>NUMB</b> , PF4, SLPI, <b>SPRYD5</b> , STAT1, <b>TNFRSF9</b> , TNFSF9, TP53, VAV1, <b>XCL1</b> , <b>XCL2</b> , XCR1, ZNF148, <b>ZNF655</b>                                                                                                      | 26    | 15              | Cellular Growth and Proliferation, Cell-to-Cell Signaling and Interaction, Inflammatory Response,            |
| 3        | <b>B3GAT1</b> , <b>C13ORF15</b> , <b>C1ORF144</b> , CADM1, <b>CD226</b> , CDC2, <b>CRTAM</b> , <b>EGR2</b> , ERBB2, FLOT2, FOSL1, FYN, GADD45, <b>GADD45G</b> , GBX2, GJB1, GLRA1, HMGA2, <b>HOPX</b> , ID4, MAPKBIP1, MIR9-1, <b>MR1</b> , <b>PIK3CB</b> , Plexin A, Plexin B, PLXNA1, PRX, <b>PTPN13</b> , REST, <b>RND1</b> , SLC18A3, SRC, SRF, TXK                                                                                                                      | 21    | 12              | Cell-to-Cell Signaling and Interaction, Neurological Disease, Cellular Development                           |
| 4        | A1CF, <b>ABCG8</b> , ANPEP, ANTXR1, APOB, ARFGAP1, CD55, CEBPB, COPB1, <b>CPN1</b> , <b>DMC1</b> , <b>FYCO1</b> , GBE1, GJB1, HNF1A, HNF4A, JUNB, LRP5, <b>LRP6</b> , <b>MGEA5</b> , NUF2, PEX13, PLG, PPP1CA, PPP1R2, PPP1R8, <b>PPP1R11</b> , PPP1R2P9, <b>PPP1R9A</b> , PPP2R5B, <b>PRG2</b> , SCD, SLPI, <b>STK19</b> , <b>WBP1</b>                                                                                                                                      | 18    | 11              | Cardiovascular Disease, Lipid Metabolism, Molecular Transport                                                |

**Table b:** Significant networks (Score ≥ 15) derived from the up- and downregulated genes in iLP compared to inflamed sample.

| Net-work | Molecules in network                                                                                                                                                                                                                                                                                                                                                                                                                                 | Score | Focus molecules | Top functions                                                                                                  |
|----------|------------------------------------------------------------------------------------------------------------------------------------------------------------------------------------------------------------------------------------------------------------------------------------------------------------------------------------------------------------------------------------------------------------------------------------------------------|-------|-----------------|----------------------------------------------------------------------------------------------------------------|
| 1        | Ap1, <b>ATP2A3</b> , <b>BAT2L</b> , Calbindin, CCR3, <b>CD59</b> , CHEMOKINE, Creb, <b>CXCL5</b> , <b>CXCL6</b> , <b>CXCL9</b> , <b>CXCL11</b> , <b>EHMT2</b> , <b>ELP3</b> , <b>ETS1</b> , <b>GZMB</b> , H3F3B, Histone h3, Histone h4, HIVEP3, <b>IFNG</b> , <b>IL2</b> , <b>IL17A</b> , <b>MCM4</b> , <b>NF1</b> , Nfat (family), NFκB (complex), REL/RELA/RELB, RNA polymerase II, <b>SERPINB2</b> , SRGN, TFIIA, THAP7, <b>TNFRSF4</b> , TNFSF4 | 31    | 18              | Cell-to-Cell Signaling and Interaction, Hematological System Development and Function, Immune Cell Trafficking |
| 2        | <b>ABCG8</b> , ACTR5, ACTR8, ADSS, <b>CD226</b> , DHX8, DSN1, ERVK6, GATS, <b>GBE1</b> , HLA-B, HNF4A, INO80, INO80B, <b>INO80D</b> , INO80E, ITGAL, ITGB1, <b>LGALS8</b> , <b>LILRB3</b> , <b>MIS12</b> , NSL1, NUF2, PGD, PPARA, <b>PPP1R11</b> , <b>PRIC285</b> , <b>PTPN13</b> , <b>RPRD1B</b> , <b>RPS14</b> , RUVBL1, <b>SLC16A6</b> , <b>STK19</b> , TPP2, <b>ZNF317</b>                                                                      | 27    | 15              | Endocrine System Disorders, Immunological Disease, Metabolic Disease                                           |
| 3        | <b>B3GAT1</b> , CA11, COL11A1, <b>EHMT2</b> , <b>FGF2</b> , FGF5, FGF9, FGF19, FGFRL1, GATA1, <b>GBP1</b> , <b>GBP4</b> , HDAC2, heparin, <b>HOPX</b> , <b>IDO1</b> , IFIT3, IFITM1, <b>INHBB</b> , Interferon Regulatory Factor, IRF7, <b>IRF9</b> , LRDD, <b>MX2</b> , <b>PRKAA2</b> , RCOR1, REST, <b>RIPK1</b> , STMN2, TP53, <b>TRIO</b> , <b>XCL1</b> , <b>XCL2</b> , XCR1, ZBP1                                                               | 24    | 14              | Gene Expression, Cellular Development, Cell Cycle                                                              |
| 4        | AHNAK, ALDOC, BAG1, <b>C1ORF144</b> , CSH1, DFFA, FOS, GRIN1, HIF1A, HTT, JUN/JUNB/JUND, <b>KDM3A</b> , <b>L3MBTL</b> , LCK, <b>LOX</b> , <b>LYST</b> , MIR17, MIRLET7A1, <b>PHF8</b> , <b>PHF13</b> , <b>PRRX1</b> , <b>RAI14</b> , RB1, RBP1, RTN1, <b>SEMA4B</b> , SH3BP4, <b>SLC4A7</b> , <b>SRGAP1</b> , <b>TNFRSF9</b> , UCP3, VSNL1, YWHAB, YWHAZ, <b>ZNF655</b>                                                                              | 23    | 14              | Cell Morphology, Hematological System Development and Function, Cell Cycle                                     |

**Table c:** Significant networks (Score  $\geq$  15) derived from the up - and downregulated genes in iLP(A) compared to inflamed sample.

| Net-work | Molecules in network                                                                                                                                                                                                                                                                                                                                                                                                                                                                              | Score | Focus molecules | Top functions                                                                            |
|----------|---------------------------------------------------------------------------------------------------------------------------------------------------------------------------------------------------------------------------------------------------------------------------------------------------------------------------------------------------------------------------------------------------------------------------------------------------------------------------------------------------|-------|-----------------|------------------------------------------------------------------------------------------|
| 1        | Ap1, <b>BAT2L</b> , <b>BCL10</b> , Caspase, CHEMOKINE, Creb, <b>CXCL5</b> , <b>CXCL6</b> , <b>CXCL9</b> , <b>CXCL11</b> , <b>EHMT2</b> , <b>ETS1</b> , <b>GZMB</b> , Histone h3, Histone h4, <b>HOXA9</b> , <b>IFNG</b> , <b>IL2</b> , <b>IL17A</b> , <b>IL2RA</b> , <b>IL7R</b> , <b>MCM4</b> , <b>MED6</b> , <b>MS12</b> , Nfat (family), NF $\kappa$ B (complex), REL/RELA/RELB, <b>RIPK1</b> , RNA polymerase II, <b>SERPINB2</b> , <b>STAT4</b> , STAT5a/b, <b>TNFRSF4</b> , TNFSF4, WHSC1L1 | 41    | 22              | Cellular Development, Cellular Growth and Proliferation, Inflammatory Response           |
| 2        | A1CF, ANPEP, ARFGAP1, C12ORF11, CD55, <b>CD226</b> , COPB1, <b>CPN1</b> , <b>DUSP15</b> , EFS, ERFF1, <b>FYCO1</b> , FYN, <b>GBE1</b> , GJB1, GRB2, HIST2H2AA3, HNF1A, HNF4A, <b>IL11</b> , IL11RA, IL2RB, IL6ST, NUF2, ORC1L, PEX13, <b>RAI14</b> , SF3B4, <b>SLC16A6</b> , SLPI, <b>STK19</b> , VAV1, <b>WBP1</b> , <b>ZNF317</b> , <b>ZNF655</b>                                                                                                                                               | 16    | 10              | Cell Death, Cell-to-Cell Signaling and Interaction, Cell Morphology                      |
| 3        | APP, BACE1, BLMH, chondroitin sulfate C, Ck2, COL11A1, <b>FAM57A</b> , <b>FGF2</b> , FGF5, FGF7, FGF9, FGF10, FGF19, FGFR4, FGFR1, FMR1, ganglioside GM1, <b>GZMB</b> , HABP2, heparan sulfate, heparin, LRP, MIR1-2, MIR29A, MIRLET7A1, <b>NUFIP2</b> , <b>PAPD5</b> , PAWR, PF4, <b>PHF8</b> , <b>SLC4A7</b> , <b>TNRC6C</b> , <b>XCL1</b> , <b>XCL2</b> , XCR1                                                                                                                                 | 16    | 10              | Cellular Assembly and Organization, Carbohydrate Metabolism, Small Molecule Biochemistry |

**Table d:** Significant networks (Score ≥ 15) derived from the up - and downregulated genes in iBL23 compared to inflamed sample.

| Net-work | Molecules in network                                                                                                                                                                                                                                                                                                                                                                                                                                               | Score | Focus molecules | Top functions                                                                                                |
|----------|--------------------------------------------------------------------------------------------------------------------------------------------------------------------------------------------------------------------------------------------------------------------------------------------------------------------------------------------------------------------------------------------------------------------------------------------------------------------|-------|-----------------|--------------------------------------------------------------------------------------------------------------|
| 1        | Ap1, <b>ATP2A3</b> , <b>BAT2L</b> , CCR3, CHEMOKINE, Creb, <b>CXCL5</b> , <b>CXCL6</b> , <b>CXCL9</b> , <b>CXCL11</b> , CXCR3, <b>EHMT2</b> , <b>ETS1</b> , <b>FSCN1</b> , <b>GABBR1</b> , <b>GZMB</b> , Histone h3, Histone h4, HIVEP3, <b>HOXA9</b> , <b>IFNG</b> , <b>IL2</b> , Il12 (family), <b>IL17A</b> , <b>MCM4</b> , <b>NF1</b> , Nfat (family), NFκB (complex), REL/RELA/RELB, RNA polymerase II, SRGN, <b>STAT4</b> , <b>TNFRSF4</b> , TNFSF4, WHSC1L1 | 32    | 18              | Cell-to-Cell Signaling and Interaction, Inflammatory Response, Hematological System Development and Function |
| 2        | <b>CCNG2</b> , CDK4, DGKA, EGR2, FN1, GATA1, <b>GBP1</b> , <b>GBP4</b> , heparin, <b>ID2</b> , <b>IDO1</b> , IFITM1, <b>INHBB</b> , Interferon Regulatory Factor, IRF7, <b>IRF9</b> , LCK, <b>LOX</b> , <b>MR1</b> , <b>MX2</b> , <b>PITPNC1</b> , PPT2, <b>PRKAA2</b> , <b>PRRX1</b> , RB1, <b>TNFRSF9</b> , TNFSF9, TP53, <b>TRIO</b> , <b>XCL1</b> , <b>XCL2</b> , XCR1, ZFB36, ZNF148, <b>ZNF655</b>                                                           | 30    | 17              | Cell Cycle, Cellular Development, Cellular Growth and Proliferation                                          |
| 3        | ARFGAP1, <b>B3GAT1</b> , CD55, <b>CD226</b> , COPB1, DLG4, DSN1, FYN, <b>GABBR1</b> , GIPC2, HNF4A, <b>IER5L</b> , <b>IL11</b> , IL11RA, IL2RB, IL6ST, LPIN1, <b>MIS12</b> , NDC80, NSL1, NUF2, POU5F1, PPARA, <b>PRIC285</b> , REST, SCD, <b>SEMA4B</b> , SF3B4, <b>SLC16A6</b> . ST13, TCF7, <b>WBP1</b> , WIPF1, WWP2, <b>ZNF317</b>                                                                                                                            | 19    | 11              | Lipid Metabolism, Molecular Transport, Small Molecule Biochemistry                                           |
| 4        | ACTR5, <b>AIF1L</b> , BLMH, BMP1, <b>C1ORF144</b> , CASP2, CASP3, CCDC50, <b>CPA5</b> , CTRL, CTSS, ERVK6, FGL2, GATS, HABP2, INO80, <b>INO80D</b> INO80E, <b>KDM3A</b> , <b>LRP6</b> , MAP3K7IP3, MIR17, PAPP, peptidase, <b>PHF13</b> , <b>PPP1R11</b> , PPP2R5C, <b>RAI14</b> , <b>RIPK1</b> , RIPK3, RNF130, RUVBL1, TAX1BP1, UBC, ZBP1                                                                                                                        | 17    | 10              | Protein Degradation, Protein Synthesis, Reproductive System Disease                                          |
