# Supplementary material
Source: PubMed Central journal article supplement (PMC3575885)

**Article title:**

*Lactobacillus paracasei* and *Lactobacillus plantarum* Strains Downregulate Proinflammatory Genes in an *Ex Vivo* System of Cultured Human Colonic Mucosa

**Journal:**

Genes & Nutrition

**Authors:**

Christine Bäuerl<sup>a</sup>, Marta Llopis<sup>b</sup>, María Antolín<sup>b</sup>, Vicente Monedero<sup>a</sup>, Manuel Mata<sup>c</sup>, Manuel Zúñiga<sup>a</sup>, Francisco Guarner<sup>b</sup> and Gaspar Pérez Martínez<sup>a</sup>

**Affiliation:**

<sup>a</sup> Department of Food Biotechnology, Instituto de Agroquímica y Tecnología de Alimentos, CSIC, Valencia, Spain

<sup>b</sup> Digestive System Research Unit, University Hospital Vall d’Hebron, Centro de Investigación Biomédica en Red de Enfermedades Hepáticas y Digestivas (Ciberehd), Barcelona, Spain

<sup>c</sup> Research Foundation, Hospital General Universitario, University of Valencia, Valencia, Spain

**E-Mail of the corresponding Author Address:**

Gaspar Perez Martinez, e-mail: [gaspar.perez@iata.csic.es](mailto:gaspar.perez@iata.csic.es)

## Online Resource 8: Network Legend

### Network shapes:

-  Chemical or Drug
-  Cytokine
-  Enzyme
-  G-protein Coupled Receptor
-  Group or Complex
-  Growth Factor
-  Ion Channel
-  Kinase
-  Ligand-dependent Nuclear Receptor
-  Peptidase
-  Phosphatase
-  Transcription Regulator
-  Translation Regulator
-  Transmembrane Receptor
-  Transporter
-  Other

### Relationships:

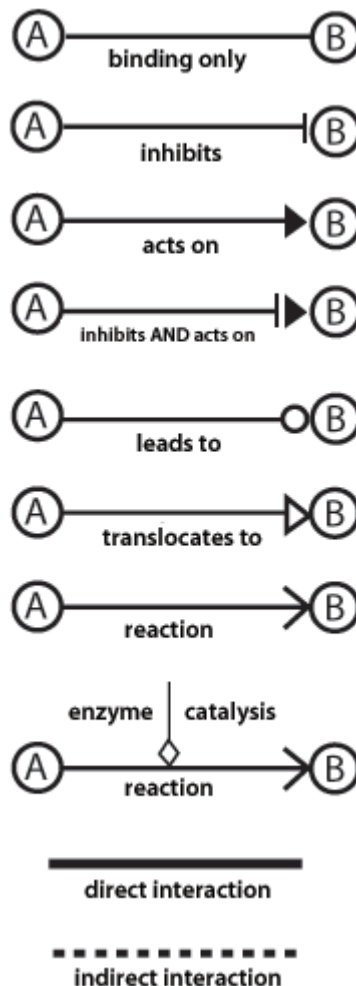

Supplement: 12263_2012_301_MOESM8_ESM.pdf [file 12263_2012_301_MOESM8_ESM.pdf]
